1 A recombinant fragment of Human surfactant protein D binds Spike  
2 protein and inhibits infectivity and replication of SARS-CoV-2 in  
3 clinical samples  
4

5

6 Taruna Madan<sup>1\*</sup>, Barnali Biswas<sup>1</sup>, Praveen M. Varghese<sup>2,3</sup>, Rambhadur Subedi<sup>1</sup>, Hrishikesh  
7 Pandit<sup>1,4</sup>, Susan Idicula-Thomas<sup>5</sup>, Indra Kundu<sup>5</sup>, Sheetalnath Rooge<sup>6</sup>, Reshu Agarwal<sup>6</sup>, Dinesh  
8 M. Tripathi<sup>7</sup>, Savneet Kaur<sup>7</sup>, Ekta Gupta<sup>6</sup>, Sanjeev K. Gupta<sup>8</sup>, Uday Kishore<sup>2\*</sup>

9

10 <sup>1</sup>Department of Innate Immunity, ICMR-National Institute for Research in Reproductive  
11 Health, Mumbai, India

12 <sup>2</sup>Biosciences, College of Health, Medicine and Life Sciences, Brunel University London,  
13 Uxbridge UB8 3PH, UK

14 <sup>3</sup>School of Biosciences and Technology, Vellore Institute of Technology, Vellore, India

15 <sup>4</sup>Current address: Human Retrovirus Section, Vaccine Branch, Center for Cancer Research,  
16 National Cancer Institute at Frederick, Frederick, Maryland, USA

17 <sup>5</sup>Biomedical Informatics Centre, ICMR- National Institute for Research in Reproductive  
18 Health, Mumbai, India

19 <sup>6</sup>Department of Molecular and Cellular Medicine, Institute of Liver and Biliary Sciences,  
20 Delhi, India

21 <sup>7</sup>Department of Virology, Institute of Liver and Biliary Sciences, Delhi, India

22 <sup>8</sup>Intrust Consulting, Mumbai, India

23

24 **\*Corresponding authors:**

25 Dr Taruna Madan, Department of Innate Immunity, ICMR-National Institute for Research in  
26 Reproductive Health, Mumbai, India ([taruna\\_m@hotmail.com](mailto:taruna_m@hotmail.com))

27 Dr Uday Kishore, Biosciences, 241, Heinz Wolff Building, Brunel University London,  
28 Uxbridge UB8 3PH, UK ([uday.kishore@brunel.ac.uk](mailto:uday.kishore@brunel.ac.uk); [ukishore@hotmail.com](mailto:ukishore@hotmail.com))

29

30

31

32

33

34

35

36 Author Contributions:

37 TM, BB, PV and RS carried out protein-related work; ST and IK carried out molecular  
38 modelling studies; TM, SR, RA, DT, SK, SG and EG contributed to the clinical samples and  
39 infection assay; TM, HP, PV, SG and UK analysed and interpreted the data, and prepared the  
40 manuscript.

41 Conception and design: TM, SG and UK

42 Analysis: TM, PV, EG, SG and UK

43 Interpretation: TM and UK

44 Drafting the first version of the manuscript: TM, BB, PV and UK

45 Review and editing of the manuscript: TM, HP and UK

46

47 Funding: The work was supported with intramural grant from ICMR-NIRRH (Accession No.  
48 RA/1002/12-2020).

49

50

51 **Running title:** rfhSP-D inhibits SARS-CoV-2 infection and replication

52 **Descriptor number:** 10.6 (Host Defences to Microbial Pathogens)

53

54 Total Word Count: 4439

55

56

57 This article has an online data supplement, which is accessible from this issue's table of content  
58 online at [www.atsjournals.org](http://www.atsjournals.org)

59

60

61

62

63

64

65

66

67 **Abstract**

68 **Rationale:** COVID -19 is an acute infectious disease caused by the Severe Acute Respiratory  
69 Syndrome Coronavirus 2 (SARS-CoV-2). Human surfactant protein D (SP-D) is known to  
70 interact with spike protein of SARS-CoV, but its immune-surveillance against SARS-CoV-2  
71 is not known.

72 **Objective:** This study aimed to examine the potential of a recombinant fragment of human SP-  
73 D (rfhSP-D) as an inhibitor of replication and infection of SARS-CoV-2.

74 **Methods:** rfhSP-D interaction with spike protein of SARS-CoV-2 and hACE-2 receptor was  
75 predicted via docking analysis. The inhibition of interaction between spike protein and ACE-2  
76 by rfhSP-D was confirmed using direct and indirect ELISA. The effect of rfhSP-D on  
77 replication and infectivity of SARS-CoV-2 from clinical samples was studied by measuring  
78 the expression of RdRp gene of the virus using qPCR.

79 **Measurements and Main Results:** *In-silico* interaction studies indicated that three amino acid  
80 residues in the RBD of spike of SARS-CoV-2 were commonly involved in interacting with  
81 rfhSP-D and ACE-2. Studies using clinical samples of SARS-CoV-2 positive cases  
82 (asymptomatic, n=7 and symptomatic, n=8 and negative controls n=15) demonstrated that  
83 treatment with 5 $\mu$ M rfhSP-D inhibited viral replication by ~5.5 fold and was more efficient  
84 than Remdesivir (100  $\mu$ M). Approximately, a 2-fold reduction in viral infectivity was also  
85 observed after treatment with 5 $\mu$ M rfhSP-D.

86 **Conclusions:** These results conclusively demonstrate that the calcium independent rfhSP-D  
87 mediated inhibition of binding between the receptor binding domain of the S1 subunit of the  
88 SARS-CoV-2 spike protein and human ACE-2, its host cell receptor, and a significant  
89 reduction in SARS-CoV-2 infection and replication *in-vitro*.

90

91 Word Count:246

92 **Keywords:** SARS-CoV-2, COVID-19, Surfactant protein D, innate immunity, Spike protein,  
93 infection, Entry inhibitor

94

95

96

97

98

99

100

101

102

103

104

## 105 **Introduction**

106

107 The COVID-19 pandemic, caused by the Severe acute respiratory syndrome Coronavirus-2  
108 (SARS-CoV-2) (1, 2), has affected ~ 58 million people across the globe and has claimed more  
109 than a million lives within its first year (3). The SARS-CoV-2 spike protein (S protein) is  
110 cleaved into S1 subunit, which is involved in host receptor binding, and S2 subunit, which is  
111 involved in membrane fusion, by the host's transmembrane Serine Protease 2 (TMPRSS2) (4).  
112 This priming of the S protein by host proteases enables it to bind with the angiotensin-  
113 converting enzyme 2 (ACE2) receptor on the nasopharyngeal epithelial cells, leading to its  
114 entry into the host cell (4). While vaccines against the virus are being developed and trialled,  
115 the current therapeutic strategy is empirical and comprises of anti-viral medications and  
116 immunosuppressants (5).

117 The innate immune system plays a crucial role against SARS-CoV-2 infection; majority of  
118 infected individuals purge the virus within a few days with minimal involvement of adaptive  
119 immune response (6). Collectins are a group of humoral pattern recognition receptors, of which  
120 human lung surfactant protein D (SP-D), is known to act as a potent viral entry inhibitor,  
121 including HIV-1 and influenza A virus (7, 8). The primary structure of SP-D is characterised  
122 by an N-terminus that is involved in multimerization; a triple-helical collagenous region made  
123 up of Gly-X-Y repeats, an  $\alpha$ -helical coiled-coil neck region, and a C-terminal C-type lectin or  
124 carbohydrate recognition domain (CRD) (9). The protective effects of SP-D against a range of  
125 bacterial, viral, and fungal pathogens leading to their agglutination, growth inhibition,  
126 enhanced phagocytosis, neutralisation, and modulation of immune responses are well  
127 documented (9, 10).

128 During the SARS-CoV epidemic in 2002, elevated levels of SP-D were reported in the serum  
129 of the patients infected with highly pathogenic  $\beta$ -CoV, SARS CoV (11). Purified SP-D has  
130 been shown to bind to the receptor-binding domain (RBD) of the glycosylated Spike protein  
131 of SARS-CoV, which shares 74% homology with the RBD of SARS-CoV-2 (12). In addition,  
132 SP-D also binds  $\alpha$ -CoV, HCoV-229E, and inhibits infection in human bronchial epithelial cells  
133 (13). These mounting pieces of evidence encouraged exploration of the therapeutic potential  
134 of SP-D in COVID-19 patients.

135 In this study, we used a well-characterised recombinant fragment of human SP-D (rfhSP-D)  
136 comprising homotrimeric neck and CRD regions to study its protective effect against SARS-  
137 CoV-2 infection. As the recombinant form has the advantage of a smaller size to reach the  
138 distal lung locations and higher resistance to proteases and collagenases over the full-length  
139 SP-D, we evaluated the interaction of rfhSP-D with RBD and Spike of SARS-CoV-2 and its  
140 inhibitory potential against infection and replication of SARS-CoV-2 in clinical samples.

## 141 **Materials and Methods**

142

### 143 **Clinical Samples**

144 The clinical samples (Table 1), nasopharyngeal (NP) and oropharyngeal (OP) swabs (n=30)  
145 used in this study, were stored at the BSL-3 facility of the Institute of Liver and Biliary  
146 Sciences, Delhi. These clinical samples (n=15) were from symptomatic contact of lab-  
147 confirmed cases (Cat 2), hospitalised severe acute respiratory infections (SARI) case-patients  
148 (Cat 4), asymptomatic direct and high-risk contacts of lab-confirmed case (Cat 5a) and  
149 hospitalised symptomatic influenza-like illness (ILI) case-patients (Cat 6) that had tested  
150 positive by RT-PCR test for SARS-CoV-2. The samples obtained were placed in the viral

151 transport medium (Hanks Balanced Salt Solution (HBSS) supplemented with 2% heat-  
152 inactivated FBS, 100 µg/ml Gentamicin and 0.5 µg/ml of Amphotericin B. NP and OP samples  
153 (n=15) that tested negative by RT-PCR test for SARS-CoV-2 were used as controls. The 50%  
154 Tissue culture Infective Dose (TCID<sub>50</sub>) of the clinical samples obtained was confirmed using  
155 an MTT assay. Briefly, 5 x 10<sup>4</sup> Vero cells in Vero growth media (MEM Glutamax,  
156 supplemented with 10% Fetal Bovine Serum, 1% v/v Penicillin-Streptomycin and 1%v/v  
157 sodium pyruvate [Gibco, Thermofisher]) were seeded in a 96 well plate and grown overnight.  
158 The clinical samples from the 15 confirmed COVID-19 patients, and the 15 controls were  
159 added to the cells and incubated for 1h. Post incubation, the wells were washed with PBS twice,  
160 and fresh Vero growth medium was added to the cells. The cells were then incubated for 96 h  
161 at 37°C, 5% CO<sub>2</sub>. A 3-[4,5-dimethylthiazol-2-yl]-2,5-diphenyltetrazolium bromide (MTT)  
162 assay was performed to assess the viability of the cells by incubating the cells with 12mM of  
163 MTT for 4 h at 37°C, 5% CO<sub>2</sub>. The formazan created was dissolved using DMSO, and the  
164 samples were read at 590 nm using a microplate reader.

### 165 ***In silico* Analysis**

166 The co-crystallised structure of human ACE-2 receptor with Spike S protein (PDB id: 6VW1)  
167 was separated into its receptor (ACE-2) and ligand (Spike S) components. The receptor and  
168 ligand were then re-docked using Patchdock web server (14, 15) to validate the docking  
169 protocol. The therapeutic agent, rfhSP-D trimer, (PDB id: 1PW9) was individually blind  
170 docked with the structure of RBD of S protein in the open conformation (PDB id: 6VYB) and  
171 dimeric ACE-2 (PDB id: 6VW1) using Patchdock. Top 100 docked poses were selected and  
172 further refined using FireDock web server (16, 17) for calculation of global free energy. The  
173 top 5 refined structures were filtered based on interactions between receptor binding motif  
174 (RBM) of S protein, CRD (CRD: aa 240-355) of rfhSP-D and N-terminal of ACE2. The effect  
175 of binding of trimeric rfhSP-D to S-protein and dimeric ACE2 on ACE2-S protein interaction  
176 was evaluated by further docking the docked complex of S protein and rfhSP-D with ACE2  
177 and ACE2 and rfhSP-D with S protein using Patchdock.

### 178 **Expression and Purification of a Recombinant Fragment of Human SP-D Containing** 179 **Neck and CRD Regions**

180 The rfhSP-D used was expressed and purified from *E. coli* as described previously (18, 19).  
181 Briefly, the pUK-D1 plasmid that codes for the 8 Gly-X-Y repeats, neck and CRD regions of  
182 human SP-D was transformed into Escherichia coli BL21 (λDE3) pLysS (Invitrogen). The  
183 transformed colonies (selected by ampicillin resistance) were grown in Luria-Bertani media  
184 supplemented with a final concentration of 100 µg/ml ampicillin and 34 µg/ml  
185 chloramphenicol (Sigma-Aldrich) to an OD<sub>600</sub> of 0.6. The bacterial culture was then induced  
186 to produce the recombinant protein by the addition of 0.5 M isopropyl β-d-1-  
187 thiogalactopyranoside (IPTG) (Sigma-Aldrich) and was allowed to grow for a further 3 h. Post  
188 incubation, the bacteria were harvested and lysed using lysis buffer (50 mM Tris-HCl pH7.5,  
189 200 mM NaCl, 5 mM EDTA pH 8, 0.1% v/v Triton X-100, 0.1 mM phenyl-methyl-sulfonyl  
190 fluoride, 50 µg/ml lysozyme) and sonicated (five cycles, 30 s each). The sonicate was harvested  
191 via centrifugation at 12,000 × g for 30 min. This was followed by solubilisation of inclusion  
192 bodies in refolding buffer (50 mM Tris-HCl pH 7.5, 100 mM NaCl, 10 mM 2-  
193 Mercaptoethanol) containing 8 M urea. and stepwise dialysis of the solubilised fraction against  
194 refolding buffer containing 4 M, 2 M, 1 M, and no urea. rfhSP-D was purified from the  
195 dialysate by affinity chromatography using a maltose agarose column (5 ml; Sigma-Aldrich).  
196 The bound rfhSP-D to the maltose was eluted using elution buffer (50 mM Tris-HCl, pH 7.5,  
197 100 mM NaCl, and 10 mM EDTA) and passed through a Pierce™ High-Capacity Endotoxin  
198 Removal Resin (Thermofisher) to remove endotoxin. Finally, the endotoxin levels were

199 measured via the QCL-1000 Limulus amoebocyte lysate system (Lonza) and found to be <5  
200 pg/ $\mu$ g of rfhSP-D. The purified rfhSP-D was subjected to western blotting after running on  
201 12% w/v acrylamide SDS-PAGE to assess purity and immunoreactivity (18).

## 202 ELISA

203 Assays to determine the binding of the S protein or its RBD of SARS-CoV-2 was performed  
204 using the SARS-CoV-2 (COVID-19) Inhibitor Screening Kit from Acrobiosystems (EP-105)  
205 as per the manufacture's protocol. Briefly, S protein diluted in Coating Buffer (15 mmol/L  
206 sodium carbonate (Na<sub>2</sub>CO<sub>3</sub>), 35 mmol/L sodium hydrogen carbonate (NaHCO<sub>3</sub>), pH 9.6) to a  
207 final concentration of 0.3  $\mu$ g/ml were added to 96 well plates and incubated overnight (~16 h)  
208 at 4°C. The uncoated protein was removed by washing the wells with Wash Buffer (PBS with  
209 0.05% (v/v) Tween-20, pH 7.4) three times. The wells were then blocked using the Blocking  
210 Buffer (PBS with 0.05% (v/v) Tween-20 and 2% (w/v) bovine serum albumin (BSA), pH 7.4)  
211 for 1.5 h at 37°C.

212 To assess the direct binding of rfhSP-D to S protein, rfhSP-D (20, 10 and 5  $\mu$ g/ml) were added  
213 to the wells. The plate was then incubated for 1 h at 37°C, and any unbound protein was  
214 removed by washing the wells three times with the wash buffer. The wells were probed using  
215 either polyclonal or monoclonal antibodies against SPD at a dilution of 1:5000 for 1 h at 37°C  
216 to detect S protein-rfhSP-D binding. Unbound antibodies were removed by washing three times  
217 using the wash buffer. Anti-mouse IgG-Horseradish peroxidase (HRP) (Cat # 31430,  
218 Invitrogen), anti-rabbit IgG HRP (Cat # 31466, Invitrogen) or Protein A HRP (Cat # 18-160,  
219 Merck) at 1: 5000 dilution was used secondary antibodies by adding them to the respective  
220 wells of the appropriate primary antibodies and incubating them for 1 h at 37°C. Following  
221 washes with wash buffer three times, the binding was detected using 3,3',5,5'-  
222 Tetramethylbenzidine (TMB) substrate (100  $\mu$ l/well) (DuoSet ELISA Ancillary Reagent Kit,  
223 R&D Systems) as per the manufacturer's instruction, followed by stopping the reaction using  
224 1M sulphuric acid (100  $\mu$ l/well) (Cat # Q29307, Thermofisher). The plate was read at 450 nm  
225 using a microplate absorbance reader (Synergy H1 multimode plate reader, Biotek). Full-length  
226 Surfactant Protein D (FL SP-D) (20  $\mu$ g/ml) was also used in a similar manner to assess the  
227 binding of S protein to FL SP-D. A similar experiment was carried out in parallel using rfhSP-  
228 D (20, 10 and 5  $\mu$ g/ml), supplemented with 10mM EDTA and probed with polyclonal  
229 antibodies against SPD (1:5000) to evaluate if the S protein-rfhSP-D binding was calcium-  
230 dependent.

231 The binding of rfhSP-D or FL SP-D to ACE-2 was evaluated using a similar experiment as  
232 above. Briefly, FL SP-D (0.1  $\mu$ g/ml) or rfhSP-D (0.1  $\mu$ g/ml) were coated in a 96 well plate and  
233 probed with decreasing concentration of ACE-2 hACE-2 (0.12, 0.06 and 0.00  $\mu$ g/ml). The  
234 binding was detected using streptavidin tagged with HRP (1:5000) (EP-105, Acrobiosystems),  
235 and the colour was developed as described above.

236 In a separate experiment to assess if rfhSP-D inhibited the interaction between the S protein  
237 and biotinylated human Angiotensin-converting enzyme 2 (hACE-2), decreasing concentration  
238 of rfhSP-D (5, 1 and 0  $\mu$ g/ml) preincubated with (hACE-2), were added to wells coated with S  
239 protein (0.3  $\mu$ g/ml) and blocked as described above. The plate was incubated for 1h at 37°C  
240 and washed with the wash buffer the times to remove any unbound proteins. The S protein-  
241 hACE-2 binding was measured by probing the wells with the HRP tagged Streptavidin  
242 antibody (1:5000) for 1h at 37°C. Colour was developed using 3,3',5,5'-Tetramethylbenzidine  
243 (TMB) substrate. The reaction was stopped using 1 M H<sub>2</sub>SO<sub>4</sub>, and the absorbance was read at  
244 450 nm using a microplate absorbance reader. rfhSP-D (5  $\mu$ g/ml) supplemented with either  
245 with 10mM EDTA was used in a similar manner to evaluate if the rfhSP-D mediated inhibition

246 of the interaction between the S protein and biotinylated hACE-2 occurred in a calcium-  
247 independent manner. rfhSP-D mediated inhibition of the interaction between the RBD of  
248 SARS-CoV-2 S protein and biotinylated hACE-2 was also assessed in a similar manner.

### 249 **Vero Cell Infection Assay**

250 Vero cell line (derived from African green monkey epithelial Kidney cells) (ATCC® CCL-  
251 81™) ( $5 \times 10^4$ ) were cultured for 16 h in each well of a 12 well plate in serum-free medium  
252 (MEM Glutamax, containing 1% v/v Penicillin-Streptomycin and 1%v/v sodium pyruvate  
253 [Gibco, Thermofisher]). SARS-CoV-2 clinical samples (100 TCID<sub>50</sub>/ well, MOI 0.01) were  
254 preincubated with rfhSP-D [0 µg/ml (0 µM), 50 µg/ml (~2.5µM) or 100 µg/ml (~5µM)] in  
255 MEM containing 5mM CaCl<sub>2</sub> for 1h at RT and 1h at 4°C. This pre-treated or untreated virus  
256 was added to the cells (Cells + rfhSP-D + Virus). After 1h incubation at 37°C, 5% CO<sub>2</sub>, the  
257 medium was removed, and cells were washed with PBS to remove any unbound CoVs.  
258 Infection medium (MEM+0.3% BSA) was added to the cells and incubated for 24 h to assess  
259 replication. The cells were then harvested by scraping with a sterile disposable cell scraper  
260 and centrifuged at 1500 x g for 5 minutes. Total RNA was extracted using the Perkin Elmer  
261 automated extractor and subjected to Real-time RT-PCR for SARS-CoV-2 using Pathodetect  
262 kits from MyLabs, as per manufacture's protocol. For the replication analysis of SARS-CoV-  
263 2, Ct value for SARS-CoV-2 RNA dependent RNA polymerase (RdRp) gene was used for  
264 analysis. Cells incubated with rfhSP-D, without virus was used protein control (Cells + rfhSP-  
265 D) and cells incubated with BSA (100µg/ml), and the virus was used as non-specific protein  
266 control (Cells + Virus). Sterile PBS with the virus was used as negative control.

267 The effect of rfhSP-D on viral infection was assessed by culturing Vero cells ( $5 \times 10^5$ ) in a 12  
268 well plate in serum-free MEM. SARS-CoV-2 clinical samples (500 TCID<sub>50</sub>/ well, MOI 0.05)  
269 were treated with rfhSP-D and added to the cells as described above. However, after the  
270 addition of the infection medium, the cells were incubated only for 2h, after which they were  
271 harvested, and Real-time RT-PCR was performed using the same controls and parameters  
272 described above.

### 273 **Statistical Analysis**

274 Graphs were generated using GraphPad Prism 8.0 software, and the statistical analysis was  
275 performed using a two-way ANOVA test. Significant values were considered based on \*p <  
276 0.1, \*\*p < 0.05, \*\*\*p < 0.01, and \*\*\*\*p < 0.001 between treated and untreated conditions.  
277 Error bars show the SD or SEM, as indicated in the figure legends.

## 278 **Results**

279

### 280 **rfhSP-D interacts with the Spike protein of SARS-CoV-2 and human ACE-2 *in silico***

281 S protein is known to interact via the receptor binding motif (RBM:455-508) in the receptor  
282 binding domain (RBD: aa 319-527) with virus binding hotspot residues comprising of Lys31,  
283 Glu35 and Lys353 of dimeric hACE2 (14-16). The structure of hACE2 receptor, co-  
284 crystallized with Spike S protein of SARS-CoV-2, is available in RCSB (pdb id: 6VW1). The  
285 receptor (ACE2) and ligand (Spike S) were separated and docked to validate the docking  
286 protocol. The redocked complex of ACE2 and S protein had root mean square deviation  
287 (RMSD) of 7.9 Å. The close agreement between the docked and crystal structures validated  
288 the docking protocol used in the study.

289 In case of docked solutions for S protein and rfhSP-D (**Supplementary Figure 1**), the third  
290 ranked docked pose with binding energy of -20.63 kcal/mol exhibited rfhSP-D interactions

291 with RBM residues Tyr449, Gln493 Gln498, implying that rfhSP-D could bind to Spike protein  
292 in a manner that can inhibit ACE2-S protein interaction (**Table 2; Figure 1**). To ascertain this  
293 hypothesis, the complex of S protein with rfhSP-D was docked to ACE2. S protein and rfhSP-  
294 D bound to ACE2 via common interacting residues.

295 The top ranked docked structure of ACE2 and rfhSP-D had binding energy of -24.30 kcal/mol.  
296 In this pose, rfhSP-D interacted with the virus-binding hotspot residues Ser19, Lys31, His34  
297 and Glu35 of ACE2, implying that rfhSP-D could bind to ACE2 in a manner that can inhibit  
298 ACE2-S protein interaction (**Table 2, Figure 1**). To corroborate this postulation, the complex  
299 of ACE2 with rfhSP-D was docked to Spike S. Top ranked pose of ACE2-rfhSP-D complex  
300 docked with open S protein had binding energy of -33.01 kcal/mol and several common  
301 interactions between rfhSP-D and ACE2 with S protein (**Supplementary Figure 1**). The  
302 docking experiments led us to infer that rfhSP-D could bind to both ACE2 and Spike S and  
303 prevent ACE2-S protein interaction.

### 304 **rfhSP-D binds to the immobilised S protein of the SARS-CoV-2 as well as hACE-2**

305 The possible binding between rfhSP-D and S protein hinted by the docking analysis was  
306 confirmed *in vitro* via an indirect ELISA. rfhSP-D was found to bind the immobilised S protein  
307 in a dose-dependent manner (**Figure 2a**). However, a significant difference in the absorbance  
308 was observed based on the specificity of the primary antibody used. S protein-rfhSP-D binding  
309 that was probed with the polyclonal antibody against SP-D reported a significantly higher  
310 absorbance when compared to the wells that were probed with a monoclonal antibody directed  
311 against the CRD of SP-D. This difference suggests involvement of CRD of rfhSP-D with the  
312 spike protein and therefore, the CRD was not available for interaction with the monoclonal  
313 antibody. S protein was also found to bind to the FL SP-D. The treatment of rfhSP-D with  
314 10mM EDTA did not significantly alter the binding of rfhSP-D to S protein (**Figure 2b**).  
315 Hence, rfhSP-D binds to the S protein in a dose-dependent but a calcium-independent manner.  
316 A similar parallel experiment revealed that rfhSP-D bound ACE2 in a dose-dependent manner  
317 (**Figure 2c**).

### 318 **rfhSP-D inhibits the interaction of S protein and its RBD with biotinylated hACE-2 in a 319 calcium-independent manner**

320 Since rfhSP-D was found to bind to the S protein and ACE-2, and as both rfhSP-D and ACE-  
321 2 were predicted to share the same binding site on S protein, rfhSP-D mediated inhibition of  
322 the interaction between the RBD of S protein of SARS-CoV-2 and ACE-2 was assessed using  
323 a colorimetric ELISA.

324 The wells were coated with either the S protein or its RBD domain that was preincubated with  
325 rfhSP-D followed by biotinylated hACE-2. The functionality and the range of the assay were  
326 initially assessed by verifying if the assay could detect the binding of hACE-2 at a  
327 concentration of 0.12 µg/ml and 0.06 µg/ml. The binding occurred in a dose-dependent manner,  
328 confirming that the assay can detect binding between S protein or its RBD domain with hACE-  
329 2 at a concentration as low as 60 ng/ml (**Supplementary Figure 2**). A decrease in binding  
330 between S protein and hACE-2 was observed as the concentration of rfhSP-D increased  
331 (**Figure 3 and Figure 4**). Approximately 50% decrease in S protein-hACE-2 binding was  
332 observed as rfhSP-D concentration increased 5-fold (**Figure 3a**). A similar result was observed  
333 between the binding of the RBD of S protein and hACE-2. An 8-fold increase in the  
334 concentration of rfhSP-D was found to decrease RBD-hACE-2 interaction by ~25% (**Figure  
335 4a**). No significant difference was observed between the samples with 10mM EDTA and  
336 without EDTA in terms of rfhSP-D mediated S protein/RBD-hACE-2 binding (**Figure 3b;  
337 Figure 4b**). Hence, rfhSP-D mediated inhibition of the interaction between the RBD of S



338 protein or the S protein itself with biotinylated hACE-2 occurred in a calcium-independent  
339 manner.

### 340 **rfhSP-D treatment inhibits SARS-CoV-2 infection and replication**

341 As rfhSP-D is known to induce apoptosis in cancer and immortalised cells (18, 20-22), the  
342 effect of rfhSP-D on Vero cells was assessed using MTT assay. rfhSP-D treatment had no  
343 significant effect on the viability of Vero cells (**Supplementary figure 3**). At the outset, the  
344 TCID<sub>50</sub> values of the clinical samples were obtained by evaluating the cytopathic effects using  
345 MTT assay. As expected, when Vero cells were challenged with 100 TCID<sub>50</sub>, or 50 TCID<sub>50</sub> of  
346 viral samples from SARS-CoV-2 clinical samples, a 50% or 25% reduction in cell viability  
347 was observed, respectively, compared to the viability of uninfected Vero cells, confirming the  
348 assayed TCID<sub>50</sub> values (**Figure 5**). The control samples showed no significant difference in the  
349 cell viability than the uninfected Vero cells when the control sample volumes equivalent to 100  
350 TCID<sub>50</sub> and 50 TCID<sub>50</sub> of the matched clinical cases were used.

351 The effect of rfhSP-D on the replication of SARS-CoV-2 (100 TCID<sub>50</sub>/well; MOI 0.01) in Vero  
352 cells was evaluated by measuring the levels of the RdRp gene of SARS-CoV-2 by RT-PCR  
353 24h post-infection. Pre-treatment of the positive samples (n=15), comprising of SARS-CoV-2  
354 with rfhSP-D, led to a reduction in RdRp levels in a dose-dependent manner (**Figure 6; Table**  
355 **S1**). The pre-treatment of samples from all categories of SARS-CoV-2 positive cases [as  
356 representatives, the figure 6 shows the data for 1S (Cat 2) and 3S (Cat 6)] with 2.5µM rfhSP-  
357 D led to ~4.5-fold reduction (-4.5 log<sub>2</sub>) of RdRp transcript compared to the untreated positive  
358 sample challenged Vero cells. There was no significant difference in the Ct values of RdRp  
359 gene from the untreated and control sample treated Vero cells. Similarly, pre-treatment with 5  
360 µM rfhSP-D resulted in ~5.5-fold reduction (-5.5 log<sub>2</sub>) of RdRp mRNA expression.  
361 Remdesivir, one of the anti-viral drugs proposed for COVID-19, which functions by inhibiting  
362 viral RNA synthesis, was found to inhibit SARS-CoV-2 replication by ~4-fold (-4 log<sub>2</sub>).  
363 Hence, rfhSP-D blocked SARS-CoV-2 infection, in addition to inhibiting the replication of  
364 SARS-CoV-2 significantly better than Remdesivir at both tested concentrations (2.5 µM and 5  
365 µM rfhSP-D).

366 As rfhSP-D was found to interact with S protein and ACE-2, proteins that play an integral role  
367 in viral host cell recognition and entry, the role of rfhSP-D in viral infectivity was assessed in  
368 a similar manner to replication. Vero cells infected with SARS-CoV-2 positive samples  
369 (500TCID<sub>50</sub>/well, MOI 0.05) showed a rfhSP-D dose-dependent decrease in the expression  
370 levels of the RdRp gene, 2h post-infection (**Figure 7; Table S2**). Clinical samples from all the  
371 categories of SARS-CoV-2 patients [As representatives, figure 7 shows the data from 2S (Cat  
372 6) and 9AS (Cat 5a)] showed ~ 1.25-fold reduction (-1.25 log<sub>2</sub>) or ~ 2-fold reduction (-2 log<sub>2</sub>)  
373 in RdRp gene expression with the samples pre-treated with either 2.5µM or 5 µM respectively  
374 of rfhSP-D. Remdesivir was used as a control (Remdesivir does not inhibit SARS-CoV-2  
375 infection). Thus, pre-treatment of SARS-CoV-2 in the clinical sample with rfhSP-D appears to  
376 make S protein unavailable to interact with the ACE-2 receptor on the host cell, thus, reducing  
377 the infectivity of the virus and subsequent viral replication in a dose-dependent manner.

### 378 **Discussion**

379

380 The present study explored the likely protective effect of a recombinant fragment of human  
381 lung surfactant protein D, rfhSP-D, against SARS-CoV-2. As predicted by the docking study,  
382 rfhSP-D interacted with the spike protein of SARS-CoV-2, its receptor binding domain (RBD)  
383 as well as ACE-2. Importantly, these interactions may have contributed to significant inhibition

384 of infectivity and replication of SARS-CoV-2 virus present in the clinical samples derived from  
385 asymptomatic, symptomatic and severe patients of COVID-19.

386 One of the first steps of the SARS-CoV-2 infection is the binding of the S protein to the host  
387 cell via, ACE-2 receptor (23). S1 protein is known to interact with ACE-2 receptor via the  
388 receptor-binding motif (RBM:455-508) in the receptor-binding domain (RBD: aa 319-527)  
389 with virus binding hotspot residues comprising of Lys31, Glu35 and Lys353 of dimeric ACE2  
390 (24-26). Since SP-D interaction with spike protein of SARS-CoV has been reported, which  
391 shares ~74% homology with the RBD of SARS-CoV-2 (12) and rfhSP-D is known to bind to  
392 viral surface proteins such as haemagglutinin and neuraminidase of influenza A virus, gp120  
393 of human immunodeficiency virus 1 (7, 27), and S protein of SARS-CoV (12), the possibility  
394 of rfhSP-D binding to the S protein of SARS-CoV-2 was examined.

395 *In-silico* interaction of rfhSP-D with RBD of Spike protein of SARS-CoV-2 revealed that  
396 Tyr449, Gln493 and Gln498 of RBD overlapped with the residues that are essential for the  
397 binding of S protein to the target protein ACE-2. The binding of S protein to rfhSP-D or FL  
398 SP-D was confirmed using an indirect ELISA. A comparatively lower absorbance with the  
399 monoclonal antibodies raised against the CRD region of human SP-D than the polyclonal  
400 antibodies could be attributed to the fact that the binding between rfhSP-D and S protein  
401 occurred through the CRD region of rfhSP-D and FL SP-D. Further, calcium independence  
402 suggested an involvement of protein-protein interaction. A significant inhibition of the S  
403 protein-ACE-2 interaction in presence of rfhSP-D suggested that rfhSP-D could interfere with  
404 the binding of the SARS-CoV-2 to the host cell, an essential step for the infection to occur.

405 Clinical samples of SARS-CoV-2 were used to assess if rfhSP-D modulated the infectivity and  
406 replication of the virus (isolation of the virus in the laboratory conditions may introduce  
407 alterations) *in vitro*. For assessing replication, qRT-PCR of the RdRp gene, which is essential  
408 for the replication of viral RNA was measured. Remdesivir was used as a positive control for  
409 replication inhibition. Remdesivir, an adenosine analogue, functions by incorporating itself  
410 into nascent viral RNA chains which results in premature termination, thereby effectively  
411 inhibiting viral RNA synthesis (28). Downregulated RdRp expression in the Remdesivir treated  
412 samples clearly validated the platform for evaluating viral replication using clinical samples.  
413 A dose-dependent reduction of the RdRp mRNA expression in Vero cells, challenged with  
414 rfhSP-D-pre-treated SARS-CoV-2 positive clinical samples at a higher fold change than  
415 Remdesivir, suggested a highly potent anti-SARS-CoV-2 activity mediated by rfhSP-D.

416 Replication kinetic studies involving Vero cells infected with SARS-CoV-2 have demonstrated  
417 a significant synthesis of viral RNA at  $\geq 6$  h post-infection (29). As such, any viral RNA  
418 detected 1-2 h post-infection could be considered to have come from the infecting viral  
419 particles and not from subsequent viral RNA synthesis or viral replication. Hence, to confirm  
420 if rfhSP-D played a role in inhibiting SARS-CoV-2 infection, Vero cells were infected with  
421 SARS-CoV-2 clinical samples at a high concentration (500TCID<sub>50</sub>; MOI 0.05) for 2h. In  
422 accordance with the previous reports, no significant effect of Remdesivir on the Ct values of  
423 Vero cells challenged with clinical samples validated the assay format (30). Reduced RdRp  
424 transcripts in presence of rfhSP-D demonstrated the ability of rfhSP-D to act as an entry  
425 inhibitor against SARS-CoV-2. These results suggest that rfhSP-D is a potential candidate to  
426 be used as an S protein-based inhibitor against SARS-CoV-2 infections. With established  
427 safety *in vivo* and therapeutic efficacy against several respiratory pathogens, rfhSP-D will  
428 effectively combat the nosocomial co-infections in COVID-19 patients.

429 There is dysregulated pro-inflammatory cytokine response without protective IFNs in response  
430 to SARS-CoV-2 mediated lung tissue damage leading to Acute Respiratory Distress Syndrome

431 (ARDS). The levels of SP-D were significantly altered in bronchoalveolar lavage of patients  
432 of ARDS and were strong predictors of poor prognosis (31, 32). Persistent complement  
433 activation leads to microangiopathy leading to hypoxia in vital organs. The current therapeutic  
434 strategy comprises of an antiviral like Remdesivir and immunosuppressants such as  
435 corticosteroids. Importantly, there is a need to rapidly clear cell debris or Damage Associated  
436 Molecular Patterns (DAMPs) and polarise protective immune response towards a protective  
437 one and regulate the complement activation. The rfhSP-D is capable of dampening the  
438 'Cytokine storm' by rapid clearance of the virus infected cells and strengthening the lung  
439 capacity by restoring homeostasis (33).

440 rfhSP-D has been previously shown to inhibit HIV-1 entry as well successfully thwart the  
441 cytokine storm in an *ex vivo* model of human vaginal tissue (27). SP-D has a compelling role  
442 in correcting lung pathophysiology and injury (34). It is possible that SP-D functions as an  
443 opsonin after binding to the S protein and helps in viral clearance. As a complement- and  
444 antibody-independent neutralisation agent against SARS-CoV-2, rfhSP-D may be a viable  
445 alternative as an inhalation formulation to control COVID-19 infection in  
446 immunocompromised/deficient people and other populations where vaccination against the  
447 virus would not be a viable option. These promising results warrant further studies in COVID-  
448 19 animal models, such as mice humanised with human ACE2 and Syrian hamsters  
449 (*Mesocricetus auratus*), to better understand the impact of rfhSP-D in the microenvironment  
450 of the respiratory system (35).

451

## 452 **Ethics Statement**

453 The project was approved by the institutional ethics committee of Institute of Liver and Biliary  
454 Sciences, Delhi (IEC/2020/80/MA04) on 20<sup>th</sup> July 2020. The committee waived off the written  
455 informed consent in due consideration of the request as these samples were stored in the facility  
456 and anonymised aliquots of the samples were provided for the study.

457

## 458 **Acknowledgments**

459 Authors acknowledge the support of Dr. Smita Mahale, Director, ICMR-NIRRH; Dr. Shiv K.  
460 Sarin Director, ILBS. The study was reviewed and recommended by ICMR Expert Review  
461 Committee, and authors acknowledge the support of Dr. Nivedita Gupta and Dr. Raman  
462 Gangakhedkar of ICMR-ECD. The study was reviewed by BIRAC-PACE expert panel.

463

464

465

466

467

468

469

470

471

472

473 **References**

474

- 475 1. Gorbalenya AE, Baker SC, Baric RS, de Groot RJ, Drosten C, Gulyaeva AA, Haagmans BL,  
476 Lauber C, Leontovich AM, Neuman BW, Penzar D, Perlman S, Poon LLM,  
477 Samborskiy DV, Sidorov IA, Sola I, Ziebuhr J, Coronaviridae Study Group of the  
478 International Committee on Taxonomy of V. The species Severe acute respiratory  
479 syndrome-related coronavirus: classifying 2019-nCoV and naming it SARS-CoV-2.  
480 *Nature Microbiology* 2020; 5: 536-544.
- 481 2. Zhu N, Zhang D, Wang W, Li X, Yang B, Song J, Zhao X, Huang B, Shi W, Lu R, Niu P,  
482 Zhan F, Ma X, Wang D, Xu W, Wu G, Gao GF, Tan W, China Novel Coronavirus I,  
483 Research T. A Novel Coronavirus from Patients with Pneumonia in China, 2019. *N*  
484 *Engl J Med* 2020; 382: 727-733.
- 485 3. COVID-19 Weekly Epidemiological Update - 24 November 2020: World Health  
486 Organization; 2020. Emergency Situational Updates.
- 487 4. Baughn LB, Sharma N, Elhaik E, Sekulic A, Bryce AH, Fonseca R. Targeting TMPRSS2 in  
488 SARS-CoV-2 Infection. *Mayo Clin Proc* 2020; 95: 1989-1999.
- 489 5. Gavriatopoulou M, Ntanasis-Stathopoulos I, Korompoki E, Fotiou D, Migkou M, Tzanninis  
490 IG, Psaltopoulou T, Kastritis E, Terpos E, Dimopoulos MA. Emerging treatment  
491 strategies for COVID-19 infection. *Clin Exp Med* 2020.
- 492 6. Carmo A, Pereira-Vaz J, Mota V, Mendes A, Morais C, da Silva AC, Camilo E, Pinto CS,  
493 Cunha E, Pereira J, Coucelo M, Martinho P, Correia L, Marques G, Araujo L,  
494 Rodrigues F. Clearance and persistence of SARS-CoV-2 RNA in patients with COVID-  
495 19. *Journal of Medical Virology* 2020; 92: 2227-2231.
- 496 7. Al-Ahdal MN, Murugaiah V, Varghese PM, Abozaid SM, Saba I, Al-Qahtani AA, Pathan  
497 AA, Kouser L, Nal B, Kishore U. Entry Inhibition and Modulation of Pro-Inflammatory  
498 Immune Response Against Influenza A Virus by a Recombinant Truncated Surfactant  
499 Protein D. *Frontiers in Immunology* 2018; 9.
- 500 8. Madsen J, Gaiha GD, Palaniyar N, Dong T, Mitchell DA, Clark HW. Surfactant Protein D  
501 Modulates HIV Infection of Both T-Cells and Dendritic Cells. *Plos One* 2013; 8.
- 502 9. Kishore U, Bernal AL, Kamran MF, Saxena S, Singh M, Sarma PU, Madan T, Chakraborty  
503 T. Surfactant proteins SP-A and SP-D in human health and disease. *Arch Immunol Ther*  
504 *Exp (Warsz)* 2005; 53: 399-417.
- 505 10. Murugaiah V, Tsolaki AG, Kishore U. Collectins: Innate Immune Pattern Recognition  
506 Molecules. *Adv Exp Med Biol* 2020; 1204: 75-127.
- 507 11. Wu YP, Liu ZH, Wei R, Pan SD, Mao NY, Chen B, Han JJ, Zhang FS, Holmskov U, Xia  
508 ZL, de Groot PG, Reid KBM, Xu WB, Sorensen GL. Elevated Plasma Surfactant  
509 Protein D (SP-D) Levels and a Direct Correlation with Anti-severe Acute Respiratory  
510 Syndrome Coronavirus-specific IgG Antibody in SARS Patients. *Scandinavian Journal*  
511 *of Immunology* 2009; 69: 508-515.
- 512 12. Leth-Larsen R, Zhong F, Chow VTK, Holmskov U, Lu JH. The SARS coronavirus spike  
513 glycoprotein is selectively recognized by lung surfactant protein D and activates  
514 macrophages. *Immunobiology* 2007; 212: 201-211.
- 515 13. Funk CJ, Wang JR, Ito Y, Travanty EA, Voelker DR, Holmes KV, Mason RJ. Infection of  
516 human alveolar macrophages by human coronavirus strain 229E. *J Gen Virol* 2012; 93:  
517 494-503.
- 518 14. Duhovny D, Nussinov R, Wolfson HJ. Efficient unbound docking of rigid molecules. *Lect*  
519 *Notes Comput Sc* 2002; 2452: 185-200.
- 520 15. Schneidman-Duhovny D, Inbar Y, Nussinov R, Wolfson HJ. PatchDock and SymmDock:  
521 servers for rigid and symmetric docking. *Nucleic Acids Res* 2005; 33: W363-W367.

- 522 16. Andrusier N, Nussinov R, Wolfson HJ. FireDock: Fast interaction refinement in molecular  
523 docking. *Proteins* 2007; 69: 139-159.
- 524 17. Mashiach E, Schneidman-Duhovny D, Andrusier N, Nussinov R, Wolfson HJ. FireDock:  
525 a web server for fast interaction refinement in molecular docking. *Nucleic Acids Res*  
526 2008; 36: W229-W232.
- 527 18. Murugaiah V, Agostinis C, Varghese PM, Belmonte B, Vieni S, Alaql FA, Alrokayan SH,  
528 Khan HA, Kaur A, Roberts T, Madan T, Bulla R, Kishore U. Hyaluronic Acid Present  
529 in the Tumor Microenvironment Can Negate the Pro-apoptotic Effect of a Recombinant  
530 Fragment of Human Surfactant Protein D on Breast Cancer Cells. *Front Immunol* 2020;  
531 11: 1171.
- 532 19. Singh M, Madan T, Waters P, Parida SK, Sarma PU, Kishore U. Protective effects of a  
533 recombinant fragment of human surfactant protein D in a murine model of pulmonary  
534 hypersensitivity induced by dust mite allergens. *Immunol Lett* 2003; 86: 299-307.
- 535 20. Kaur A, Riaz MS, Murugaiah V, Varghese PM, Singh SK, Kishore U. A Recombinant  
536 Fragment of Human Surfactant Protein D induces Apoptosis in Pancreatic Cancer Cell  
537 Lines via Fas-Mediated Pathway. *Front Immunol* 2018; 9: 1126.
- 538 21. Kumar J, Murugaiah V, Sotiriadis G, Kaur A, Jeyaneethi J, Sturniolo I, Alhamlan FS,  
539 Chatterjee J, Hall M, Kishore U, Karteris E. Surfactant Protein D as a Potential  
540 Biomarker and Therapeutic Target in Ovarian Cancer. *Front Oncol* 2019; 9: 542.
- 541 22. Thakur G, Prakash G, Murthy V, Sable N, Menon S, Alrokayan SH, Khan HA, Murugaiah  
542 V, Bakshi G, Kishore U, Madan T. Human SP-D Acts as an Innate Immune  
543 Surveillance Molecule Against Androgen-Responsive and Androgen-Resistant  
544 Prostate Cancer Cells. *Front Oncol* 2019; 9: 565.
- 545 23. Benton DJ, Wrobel AG, Xu PQ, Roustan C, Martin SR, Rosenthal PB, Skehel JJ, Gamblin  
546 SJ. Receptor binding and priming of the spike protein of SARS-CoV-2 for membrane  
547 fusion. *Nature* 2020.
- 548 24. Lan J, Ge JW, Yu JF, Shan SS, Zhou H, Fan SL, Zhang Q, Shi XL, Wang QS, Zhang LQ,  
549 Wang XQ. Structure of the SARS-CoV-2 spike receptor-binding domain bound to the  
550 ACE2 receptor. *Nature* 2020; 581: 215-+.
- 551 25. Shang J, Ye G, Shi K, Wan Y, Luo C, Aihara H, Geng Q, Auerbach A, Li F. Structural  
552 basis of receptor recognition by SARS-CoV-2. *Nature* 2020; 581: 221-224.
- 553 26. Lui I, Zhou XX, Lim SA, Elledge SK, Solomon P, Rettko NJ, Zha BS, Kirkemo LL,  
554 Gramespacher JA, Liu J, Muecksch F, Lorenzi JCC, Schmidt F, Weisblum Y, Robbiani  
555 DF, Nussenzweig MC, Hatziioannou T, Bieniasz PD, Rosenburg OS, Leung KK, Wells  
556 JA. Trimeric SARS-CoV-2 Spike interacts with dimeric ACE2 with limited intra-Spike  
557 avidity. *bioRxiv* 2020: 2020.2005.2021.109157.
- 558 27. Pandit H, Gopal S, Sonawani A, Yadav AK, Qaseem AS, Warke H, Patil A, Gajbhiye R,  
559 Kulkarni V, Al-Mozaini MA, Idicula-Thomas S, Kishore U, Madan T. Surfactant  
560 Protein D Inhibits HIV-1 Infection of Target Cells via Interference with gp120-CD4  
561 Interaction and Modulates Pro-Inflammatory Cytokine Production. *Plos One* 2014; 9.
- 562 28. Eastman RT, Roth JS, Brimacombe KR, Simeonov A, Shen M, Patnaik S, Hall MD.  
563 Remdesivir: A Review of Its Discovery and Development Leading to Emergency Use  
564 Authorization for Treatment of COVID-19. *Acs Central Sci* 2020; 6: 672-683.
- 565 29. Ogando NS, Dalebout TJ, Zevenhoven-Dobbe JC, Limpens RWAL, van der Meer Y, Caly  
566 L, Druce J, de Vries JJC, Kikkert M, Barcena M, Sidorov I, Snijder EJ. SARS-  
567 coronavirus-2 replication in Vero E6 cells: replication kinetics, rapid adaptation and  
568 cytopathology. *J Gen Virol* 2020; 101: 925-940.
- 569 30. Wang ML, Cao RY, Zhang LK, Yang XL, Liu J, Xu MY, Shi ZL, Hu ZH, Zhong W, Xiao  
570 GF. Remdesivir and chloroquine effectively inhibit the recently emerged novel  
571 coronavirus (2019-nCoV) in vitro. *Cell Res* 2020; 30: 269-271.

- 572 31. Greene KE, Wright JR, Steinberg KP, Ruzinski JT, Caldwell E, Wong WB, Hull W,  
573 Whitsett JA, Akino T, Kuroki Y, Nagae H, Hudson LD, Martin TR. Serial changes in  
574 surfactant-associated proteins in lung and serum before and after onset of ARDS. *Am J*  
575 *Resp Crit Care* 1999; 160: 1843-1850.
- 576 32. Park J, Pabon M, Choi AMK, Siempos II, Fredenburgh LE, Baron RM, Jeon K, Chung CR,  
577 Yang JH, Park CM, Suh GY. Plasma surfactant protein-D as a diagnostic biomarker for  
578 acute respiratory distress syndrome: validation in US and Korean cohorts. *Bmc Pulm*  
579 *Med* 2017; 17.
- 580 33. Vandivier RW, Ogden CA, Fadok VA, Hoffmann PR, Brown KK, Botto M, Walport MJ,  
581 Fisher JH, Henson PM, Greene KE. Role of surfactant proteins D, D, and C1q in the  
582 clearance of apoptotic cells in vivo and in vitro: Calreticulin and CD91 as a common  
583 collectin receptor complex. *Journal of Immunology* 2002; 169: 3978-3986.
- 584 34. Knudsen L, Ochs M, MacKay R, Townsend P, Deb R, Muehlfeld C, Richter J, Gilbert F,  
585 Hawgood S, Reid K, Clark H. Truncated recombinant human SP-D attenuates  
586 emphysema and type II cell changes in SP-D deficient mice. *Resp Res* 2007; 8.
- 587 35. Munoz-Fontela C, Dowling WE, Funnell SGP, Gsell PS, Riveros-Balta AX, Albrecht RA,  
588 Andersen H, Baric RS, Carroll MW, Cavaleri M, Qin C, Crozier I, Dallmeier K, de  
589 Waal L, de Wit E, Delang L, Dohm E, Duprex WP, Falzarano D, Finch CL, Frieman  
590 MB, Graham BS, Gralinski LE, Guilfoyle K, Haagmans BL, Hamilton GA, Hartman  
591 AL, Herfst S, Kaptein SJF, Klimstra WB, Knezevic I, Krause PR, Kuhn JH, Le Grand  
592 R, Lewis MG, Liu WC, Maisonnasse P, McElroy AK, Munster V, Oreshkova N,  
593 Rasmussen AL, Rocha-Pereira J, Rockx B, Rodriguez E, Rogers TF, Salguero FJ,  
594 Schotsaert M, Stittelaar KJ, Thibaut HJ, Tseng CT, Vergara-Alert J, Beer M, Brasel T,  
595 Chan JFW, Garcia-Sastre A, Neyts J, Perlman S, Reed DS, Richt JA, Roy CJ, Segales  
596 J, Vasan SS, Henao-Restrepo AM, Barouch DH. Animal models for COVID-19. *Nature*  
597 2020; 586: 509-515.

598

599

600

601

602

603

604

605

606

607

608

609

610

611

612

613

614

## 615 **Figure Legends**

616

617 **Figure 1: Tripartite interaction between S protein (Green), rfhSP-D (Red) and ACE-2**  
618 **(Blue) [A, B (zoomed view)].**

619 ACE-2 residues, Ser19, Lys31, Glu35 and His34, interact with both S protein and rfhSP-D.  
620 The interactions between S protein and ACE-2 are deduced from the crystal structure (PDB  
621 ID: 6VW1) and between rfhSP-D, and ACE-2 protein are based on docked complexes.  
622 Individual intermolecular interactions between **(C)** S protein (Green) and ACE-2 (Blue); **(D)** S  
623 protein (Green) and rfhSP-D (Red) and **(E)** rfhSP-D (Red) and ACE-2 (Blue). The S protein  
624 residues, Tyr449, Gln493 and Gln498, participate in intermolecular interactions with both  
625 ACE-2 and rfhSP-D.

626 **Figure 2: rfhSP-D binds to the immobilised Spike protein (S protein) of the SARS-CoV-**  
627 **2; immobilised rfhSP-D binds to hACE-2 in a dose-dependent but calcium-independent**  
628 **manner**

629 ELISA showing binding of rfhSP-D to the immobilised S protein in a dose-dependent manner.  
630 Microtiter wells were coated with 0.3 µg/ml of S protein. rfhSP-D (20, 10 and 5 µg/ml) were  
631 added to the wells. Full-length Surfactant Protein D (FL SP-D) (20 µg/ml) was also used in a  
632 similar manner. S protein-SP-D binding was detected with either polyclonal or monoclonal **(A)**  
633 antibodies against SP-D. To assess the effect of calcium in the rfhSP-D-S protein interaction,  
634 rfhSP-D either with/without 10mM EDTA was used in a similar manner and probed with  
635 polyclonal antibodies against SP-D **(B)**. The binding of immobilised rfhSP-D to hACE-2 **(C)**  
636 was assessed by coating microtiter wells with 0.1 µg/ml of FL SP-D or rfhSP-D. Decreasing  
637 concentration of hACE-2 (0.12, 0.06 and 0.00 µg/ml) was added to the wells. The SP-D-hACE-  
638 2 binding was detected with Streptavidin-HRP. The background was subtracted from all data  
639 points. The data were expressed as the mean of triplicates ± SD.

640 **Figure 3: rfhSP-D inhibits the interaction between Spike of SARS-CoV-2 and**  
641 **biotinylated hACE-2 in a calcium-independent manner**

642 Microtiter wells were coated with 0.3 µg/ml of S protein. rfhSP-D (5, 1 and 0 µg/ml) **(A)** pre-  
643 incubated with biotinylated human Angiotensin-converting enzyme 2 (hACE-2) was added to  
644 the wells. To assess the effect of calcium in the rfhSP-D-mediated inhibition of S protein-  
645 hACE-2 interaction **(B)**, 5 µg/ml of rfhSP-D with/without 10 mM EDTA. S protein-hACE-2  
646 binding was detected with Streptavidin-HRP. Background was subtracted from all data points.  
647 The data were normalised with 100% S protein: hACE-2 binding being defined as the mean of  
648 the absorbance recorded from the control sample (0 µg/ml of rfhSP-D). The data were  
649 presented as the mean of the normalised triplicates ± SEM for inset A and B. The data were  
650 presented as the mean of the triplicates ± SEM for inset C. Significance was determined using  
651 the two-way ANOVA (n = 3); no significant difference was observed between the samples  
652 with 10mM EDTA and without EDTA in terms of rfhSP-D-mediated S protein:hACE-2  
653 binding.

654 **Figure 4: rfhSP-D inhibits the interaction between RBD of Spike protein of SARS-CoV-**  
655 **2 and biotinylated hACE-2 in a calcium-independent manner**

656 Microtiter wells were coated with 0.1 µg/ml of S protein RBD. Decreasing concentration of  
657 rfhSP-D (1, 0.5, 0.25, 0.125, and 0 µg/ml) **(A)** co-incubated with biotinylated human  
658 Angiotensin-converting enzyme 2 (hACE-2) was added to the wells. To assess the effect of  
659 calcium in the rfhSP-D-mediated inhibition of S protein RBD: hACE-2 interaction **(B)**, 5 µg/ml

660 of rfhSP-D with/without 10mM EDTA was used. S protein RBD-hACE-2 binding was detected  
661 with Streptavidin-HRP. Background was subtracted from all data points. The data obtained  
662 were normalised with 100% S protein RBD-hACE-2 binding being defined as the mean of the  
663 absorbance recorded from the control sample (0 µg/ml of rfhSP-D). The data were presented  
664 as the mean of the normalised triplicates ± SEM for inset A and B. The data were presented as  
665 the mean of the triplicates ± SEM for inset C. Significance was determined using the two-way  
666 ANOVA (n = 3) and no significant difference was observed between the samples with 10mM  
667 EDTA and without EDTA in terms of rfhSP-D mediated S protein RBD: hACE-2 binding.

668 **Figure 5: Determination of TCID<sub>50</sub> value of the clinical samples in Vero cells using MTT**  
669 **assay**

670 Vero cells (5 x 10<sup>4</sup>/well) were seeded in complete MEM in 96-well culture plates and grown  
671 overnight at 37°C with 5% CO<sub>2</sub>. Swab samples of 15 confirmed cases of COVID-19 (n=5 of  
672 Cat2, Cat6 and Asymptomatic) and 15 controls (at different dilutions/well) were added to the  
673 cells and incubated for 1h. The supernatants were removed, and the wells were washed twice  
674 with sterile PBS. Fresh complete MEM was added to the wells, and the cells were incubated  
675 for 96 h. Viability of the cells was evaluated using MTT assay. MTT (0.5 mg/ml) containing  
676 medium was added to the wells for 4h. The supernatants were removed, and cells were lysed  
677 using DMSO. Absorbance was measured at 590nm. The data obtained were normalised with  
678 100% cell viability being defined as the mean of the absorbance recorded from the control  
679 sample (0 TCID<sub>50</sub>/well) and TCID<sub>50</sub> units were evaluated in each sample. The same assay was  
680 used to validate the cytopathic effects of 100TCID<sub>50</sub> and 50TCID<sub>50</sub> units of the samples. The  
681 representative data for cases (n=2) and controls (n=2) are presented as the mean of the  
682 normalised triplicates ± SEM Significance was determined using the two-way ANOVA (n =  
683 3) test (\*\**p* < 0.01, and \*\*\*\**p* < 0.0001).

684 **Figure 6: rfhSP-D pre-treatment of SARS-CoV-2 significantly inhibited its replication**

685 Vero cells (5 x 10<sup>4</sup>/well) were seeded in complete MEM in 96-well culture plates and grown  
686 overnight at 37°C under 5% CO<sub>2</sub>. Cells were washed with sterile PBS twice. SARS-CoV-2  
687 clinical samples (100TCID<sub>50</sub>/ well; MOI 0.01) were preincubated with rfhSP-D [0 µg/ml (0  
688 µM), 50 µg/ml (~2.5µM) or 100 µg/ml (~5µM)] in MEM containing 5mM CaCl<sub>2</sub> for 1h at RT.  
689 The pre-treated or untreated virus in the sample was added to the cells and incubated for 1h at  
690 37°C under 5% CO<sub>2</sub>. The wells were washed with PBS twice, and infection medium  
691 (MEM+0.3% BSA) was added to the cells and incubated for 24h at 37°C. The supernatants  
692 were collected, RNA was extracted by Perkin Elmer automated extractor, and subjected to  
693 qRT-PCR for SARS-CoV-2. For control samples, the volume of the sample taken was  
694 equivalent to the volume of the case sample (100 TCID<sub>50</sub>) where no RdRp expression was  
695 detected. The relative expression of RdRp was calculated using rfhSP-D untreated cells (0 µM  
696 rfhSP-D), infected with respective samples as the calibrator. Data of representative cases (n=2)  
697 is presented as the mean of triplicates (n=3). Error bars represent ± SEM. Significance  
698 (compared to 100µM Remdesivir) was determined using the two-way ANOVA test (\**p* < 0.05,  
699 \*\*\**p* < 0.01, and \*\*\*\**p* < 0.0001).

700 **Figure 7: rfhSP-D pre-treatment of SARS-CoV-2 significantly inhibited its infectivity**

701 Vero cells (5 x 10<sup>5</sup>/well) were seeded in complete MEM in 12-well culture plates and grown  
702 overnight at 37°C under 5% CO<sub>2</sub>. Cells were washed with sterile PBS twice. SARS-CoV-2  
703 clinical samples (500TCID<sub>50</sub>/well, MOI 0.05) were preincubated with rfhSP-D [0 µg/ml (0  
704 µM), 50 µg/ml (~2.5µM) or 100 µg/ml (~5µM)] in MEM containing 5mM CaCl<sub>2</sub> for 1h at RT  
705 and 1h at 4°C. This pre-treated or untreated virus containing sample was added to the cells and  
706 incubated for 1h at 37°C under 5% CO<sub>2</sub>. The wells were washed with PBS twice, and infection



707 medium (MEM+0.3% BSA) was added to the cells and incubated for 2h at 37°C under 5%  
708 CO<sub>2</sub>. The cells were scraped, and the media containing scraped cells were collected. RNA was  
709 extracted and subjected to RT-PCR for SARS-CoV-2. For control samples, the volume of the  
710 sample taken was equivalent to the volume of the case sample (500 TCID<sub>50</sub>); no RdRp  
711 expression was detected the relative expression of RdRp was calculated by using rfhSP-D  
712 untreated cells (0 μM rfhSP-D), infected with respective samples as the calibrator. Data for  
713 representative cases (n=2) is presented as the mean of triplicates (n=3). Error bars represent ±  
714 SEM. Significance [compared to control sample (Cells + Virus)] was determined using the  
715 two-way ANOVA test (\*\*\*\**p* < 0.0001).

716

717

718

719

720

721

722

723

724

725

726

727

728

729

730

731

732

733

734

735

736

737

738

739

740

741

742 **Table 1: Characteristics of clinical samples utilised in the study**

| Sample | Age | Sex | Ct value for SARS-CoV-2 E gene | Ct value for SARS-CoV-2 RdRp gene | Category |
|--------|-----|-----|--------------------------------|-----------------------------------|----------|
| 1S     | 32  | M   | 18.5                           | 15.46                             | 2        |
| 2S     | 41  | F   | 17.48                          | 15.36                             | 6        |
| 3S     | 44  | M   | 13.46                          | 12.01                             | 6        |
| 4S     | 39  | F   | 13.22                          | 12.67                             | 2        |
| 5S     | 36  | M   | 12.08                          | 14.55                             | 6        |
| 6S     | 42  | F   | 12.28                          | 9.4                               | 4        |
| 7S     | 37  | M   | 16.26                          | 15.42                             | 4        |
| 8AS    | 28  | F   | 17.15                          | 15.62                             | 4        |
| 9AS    | 32  | M   | 10.45                          | 10.8                              | 5a       |
| 10AS   | 31  | F   | 12.32                          | 12.4                              | 5a       |
| 11AS   | 26  | M   | 15.33                          | 12.52                             | 5a       |
| 12AS   | 35  | F   | 10.59                          | 12.4                              | 5a       |
| 13AS   | 38  | M   | 15.77                          | 12.89                             | 5a       |
| 14AS   | 29  | F   | 18.07                          | 10.72                             | 5a       |
| 15AS   | 33  | M   | 15.64                          | 13.81                             | 5a       |
| 1C     | 33  | M   | Nd                             | Nd                                | Control  |
| 2C     | 39  | F   | Nd                             | Nd                                | Control  |
| 3C     | 45  | M   | Nd                             | Nd                                | Control  |
| 4C     | 39  | F   | Nd                             | Nd                                | Control  |
| 5C     | 34  | M   | Nd                             | Nd                                | Control  |
| 6C     | 44  | F   | Nd                             | Nd                                | Control  |
| 7C     | 35  | M   | Nd                             | Nd                                | Control  |
| 8C     | 30  | F   | Nd                             | Nd                                | Control  |
| 9C     | 30  | M   | Nd                             | Nd                                | Control  |
| 10C    | 32  | F   | Nd                             | Nd                                | Control  |
| 11C    | 29  | M   | Nd                             | Nd                                | Control  |
| 12C    | 33  | F   | Nd                             | Nd                                | Control  |
| 13C    | 40  | M   | Nd                             | Nd                                | Control  |
| 14C    | 32  | F   | Nd                             | Nd                                | Control  |
| 15C    | 30  | M   | Nd                             | Nd                                | Control  |

\*Nd = Not detected

743

744

745

746

747

748

749

750

751 **Table 2: Results of docking of S protein, ACE-2, and rfhSP-D**

| S. No | Receptor | Ligand           | Binding energy (kcal/mol) | Interactions          |                                       |
|-------|----------|------------------|---------------------------|-----------------------|---------------------------------------|
|       |          |                  |                           | Receptor <sup>§</sup> | Ligand*                               |
| 1     | ACE-2    | S protein        | Crystal structure         | <b>Ser19</b>          | Ala475                                |
|       |          |                  |                           | Gln24                 | Asn487                                |
|       |          |                  |                           | <b>Lys31</b>          | Phe456, Glu484, Tyr489, <b>Gln493</b> |
|       |          |                  |                           | <b>His34</b>          | Leu455, Tyr453                        |
|       |          |                  |                           | <b>Glu35</b>          | <b>Gln493</b>                         |
|       |          |                  |                           | Glu37                 | Tyr505                                |
|       |          |                  |                           | Asp38                 | <b>Tyr449</b>                         |
|       |          |                  |                           | Tyr41                 | Thr500                                |
|       |          |                  |                           | Gln42                 | <b>Gln498</b>                         |
|       |          |                  |                           | Met82                 | Phe486 <sup>@</sup>                   |
|       |          |                  |                           | Tyr83                 | Gly496, Asn487, Tyr489                |
|       |          |                  |                           | Glu329                | Arg439                                |
|       |          |                  |                           | Lys353                | Tyr505, Gly502                        |
|       |          |                  |                           | Gly354                | Tyr505                                |
| 2     | rfhSP -D | S protein (Open) | -20.63                    | Gln219                | <b>Gln493</b>                         |
|       |          |                  |                           | His220                | <b>Tyr449</b>                         |
|       |          |                  |                           | Ala223                | <b>Gln493</b> , Phe490                |
|       |          |                  |                           | Ser226                | Ser494                                |
|       |          |                  |                           | Lys229                | <b>Tyr449</b>                         |
|       |          |                  |                           | Ser239                | Asn450                                |
|       |          |                  |                           | Gly241                | Asn448, <b>Gln498</b>                 |
|       |          |                  |                           | Glu242                | <b>Gln498</b>                         |
|       |          |                  |                           | Gln263                | Arg346                                |
|       |          |                  |                           | Thr308                | Arg466                                |
| 3     | ACE-2    | rfhSP-D          | -24.30                    | <b>Ser19</b>          | Ser328                                |
|       |          |                  |                           | Asp30                 | Thr255                                |
|       |          |                  |                           | <b>Lys31</b>          | Thr305                                |
|       |          |                  |                           | <b>His34</b>          | Gln258                                |
|       |          |                  |                           | <b>Glu35</b>          | Pro307, Gly309                        |
|       |          |                  |                           | Glu75                 | Lys299                                |
|       |          |                  |                           | Gly319                | Ala275                                |
|       |          |                  |                           | Pro321                | Ala275                                |
|       |          |                  |                           | Gln552                | Ala274, Tyr314                        |

752

753 \*The S protein residues in bold are predicted to be part of the common binding site for ACE2  
754 and rfhSP-D.

755 <sup>§</sup>The ACE2 residues in bold interact with both S protein and rfhSP-D (docked structure).

756 <sup>@</sup>The structural coordinates of Phe486 is missing in the open conformation S protein (PDB  
757 ID: 6VYB).

758

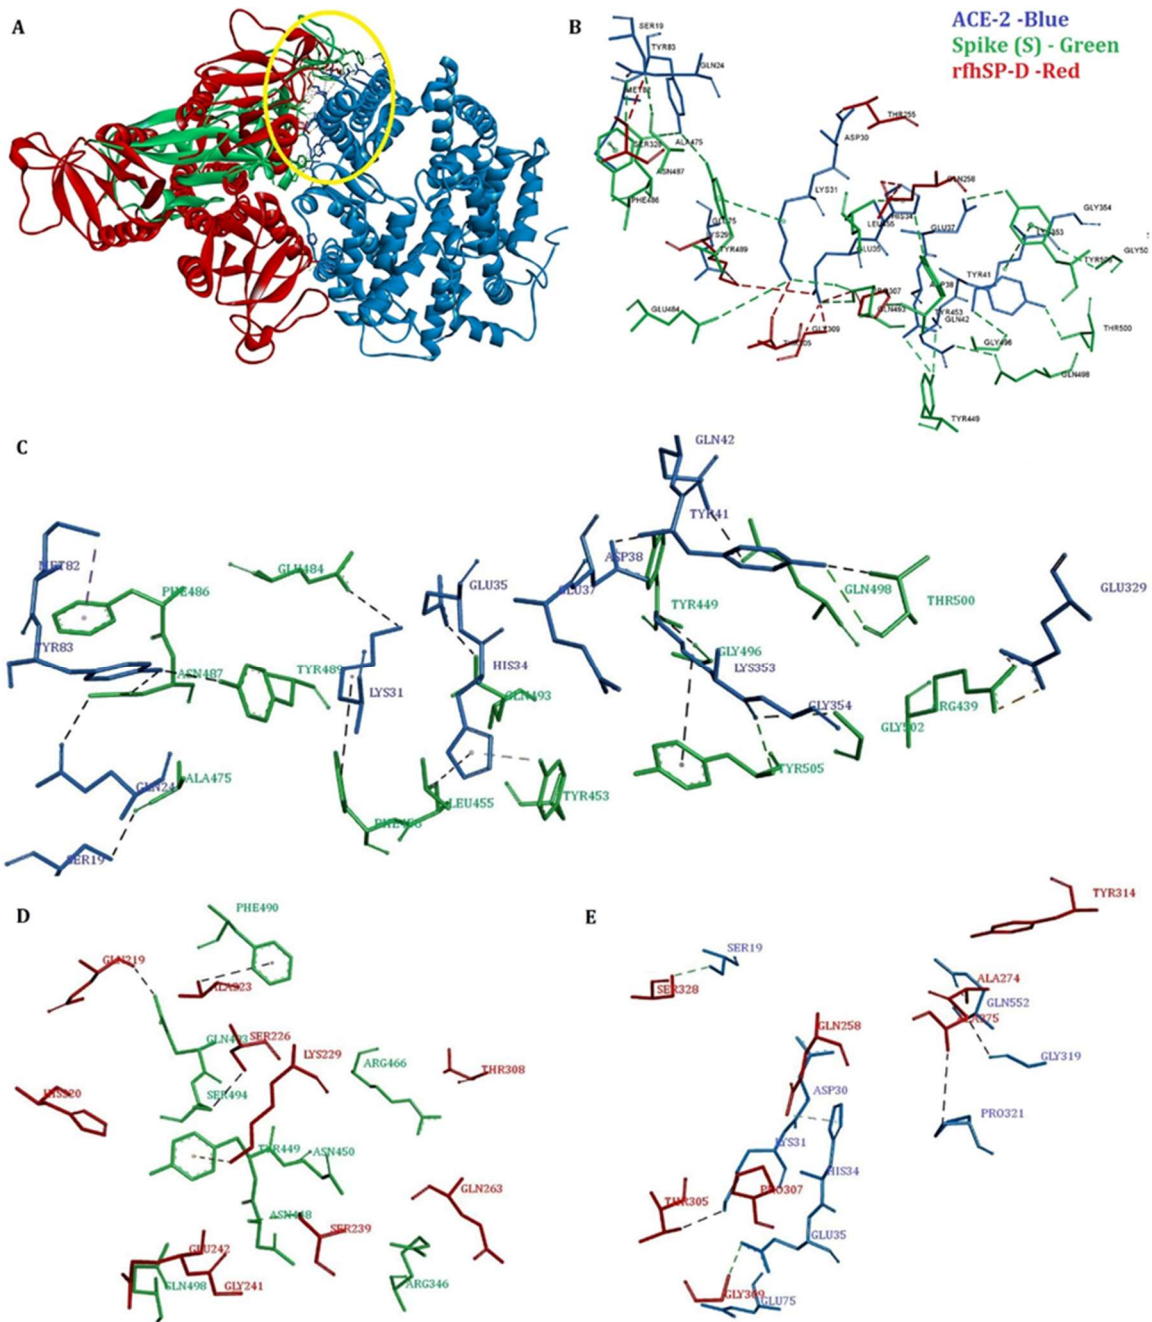

759

760 **Figure 1.**

761

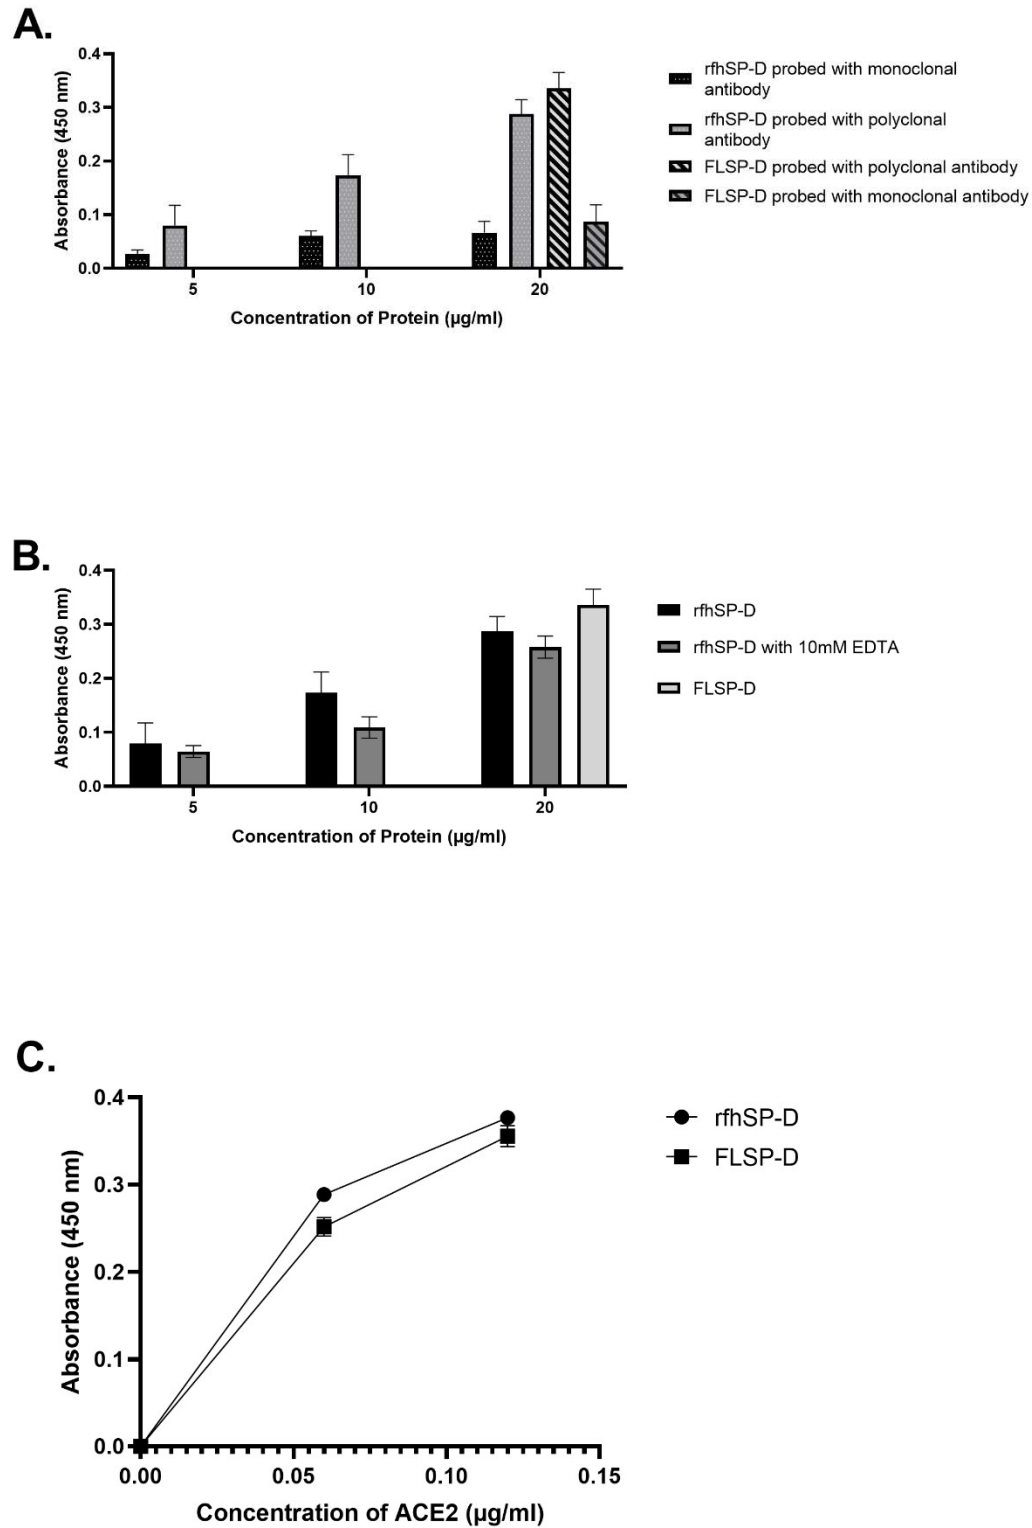

762

763 **Figure 2.**

764

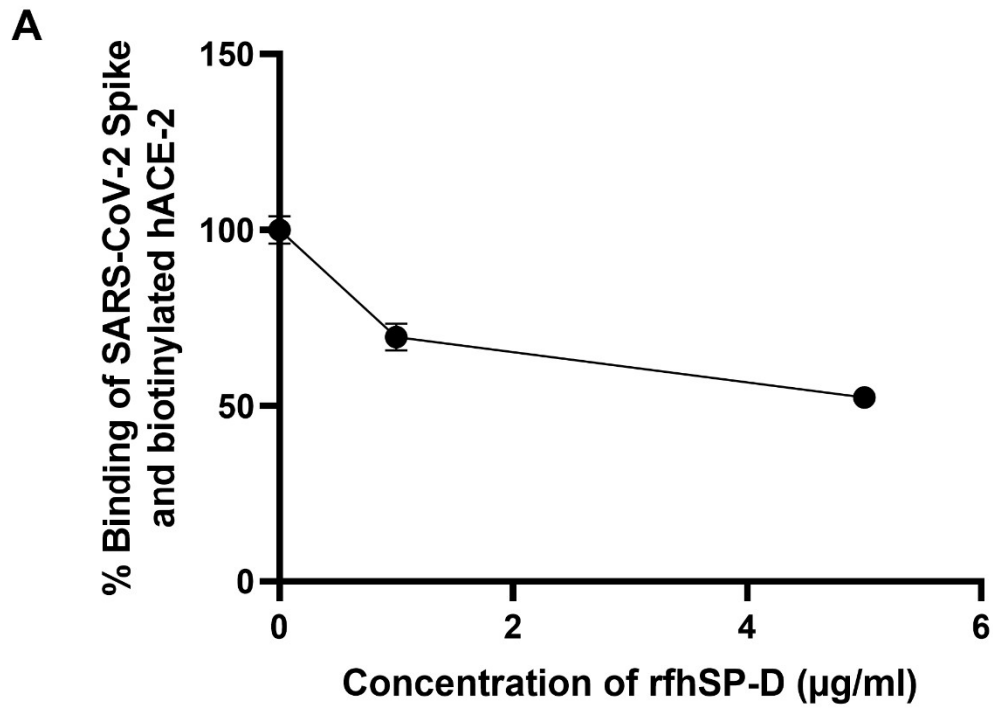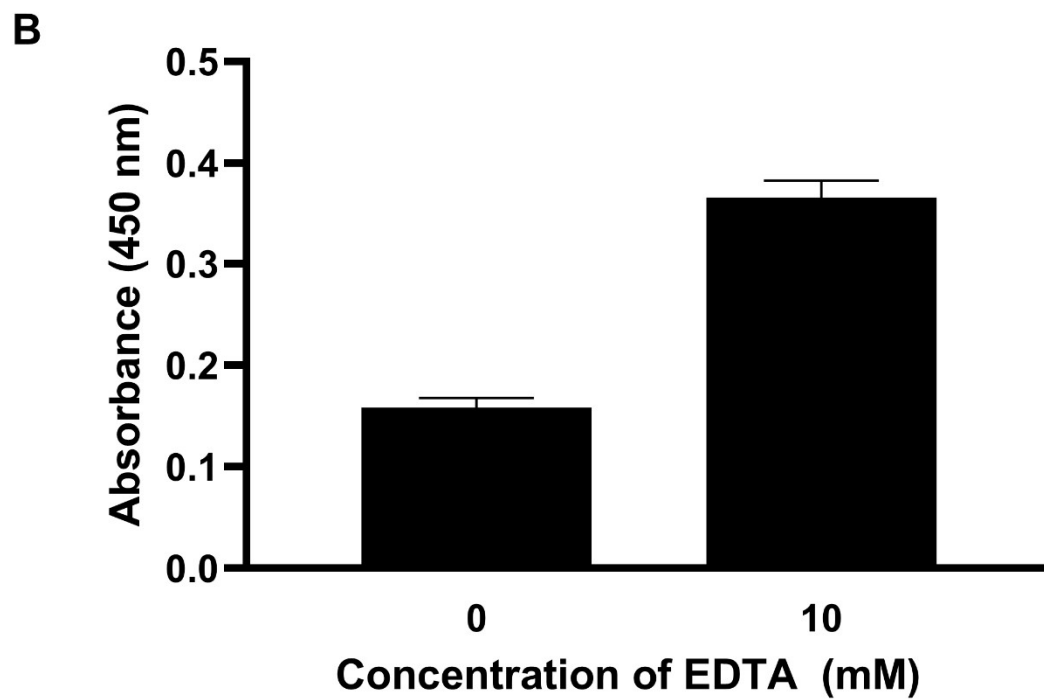

765

766 **Figure 3.**

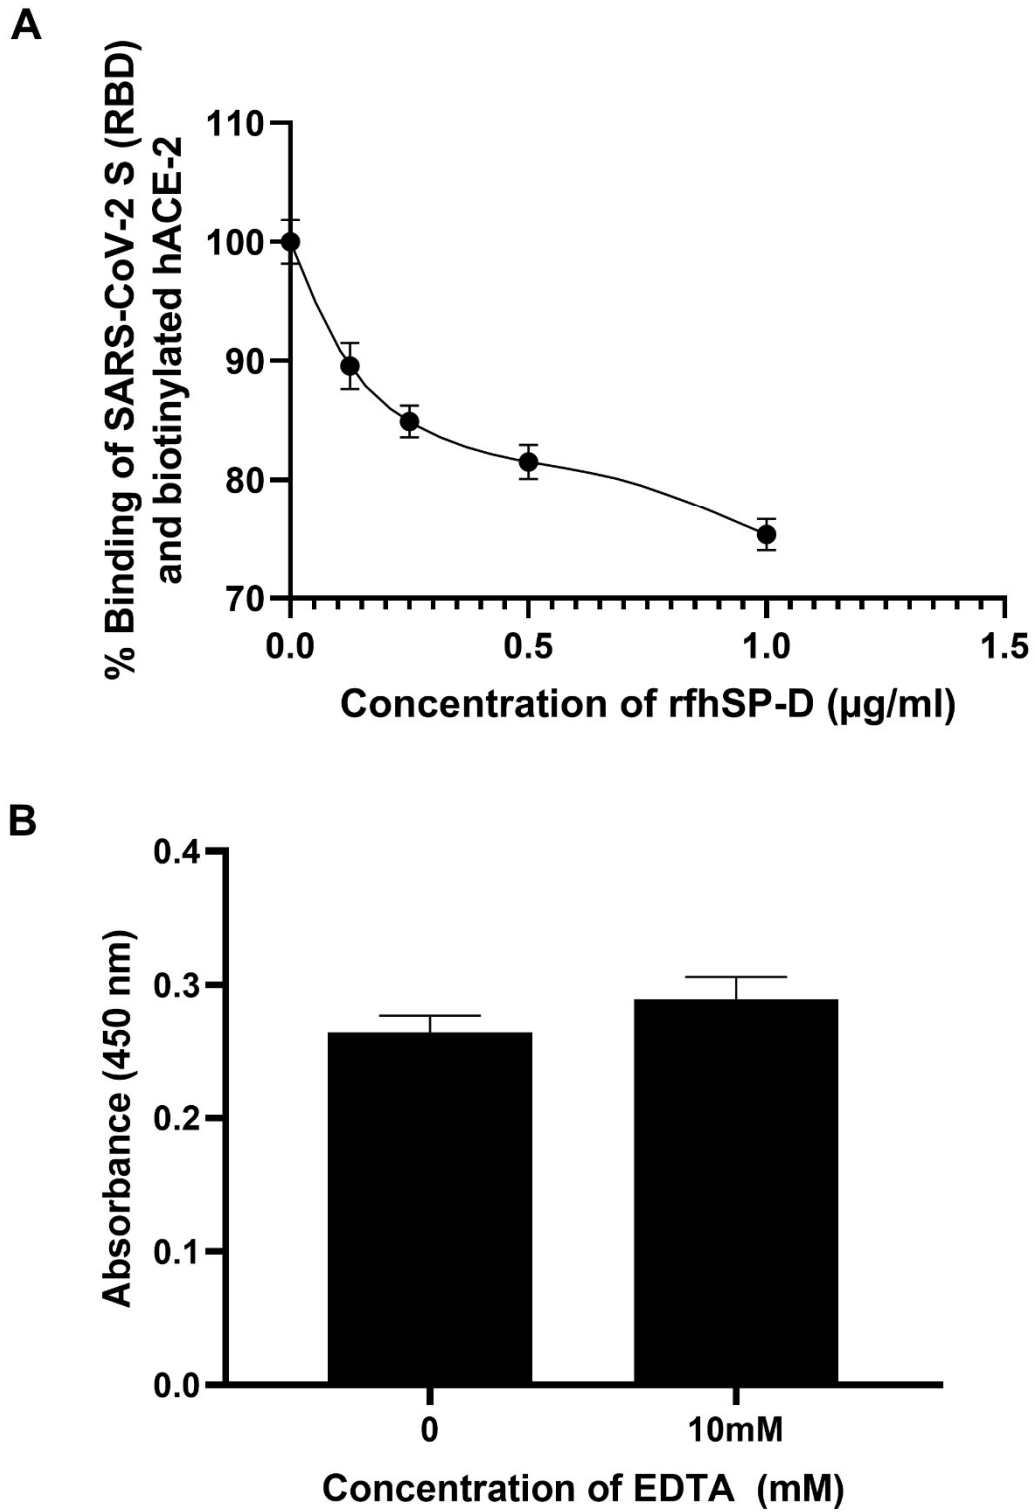

767

768 **Figure 4.**

769

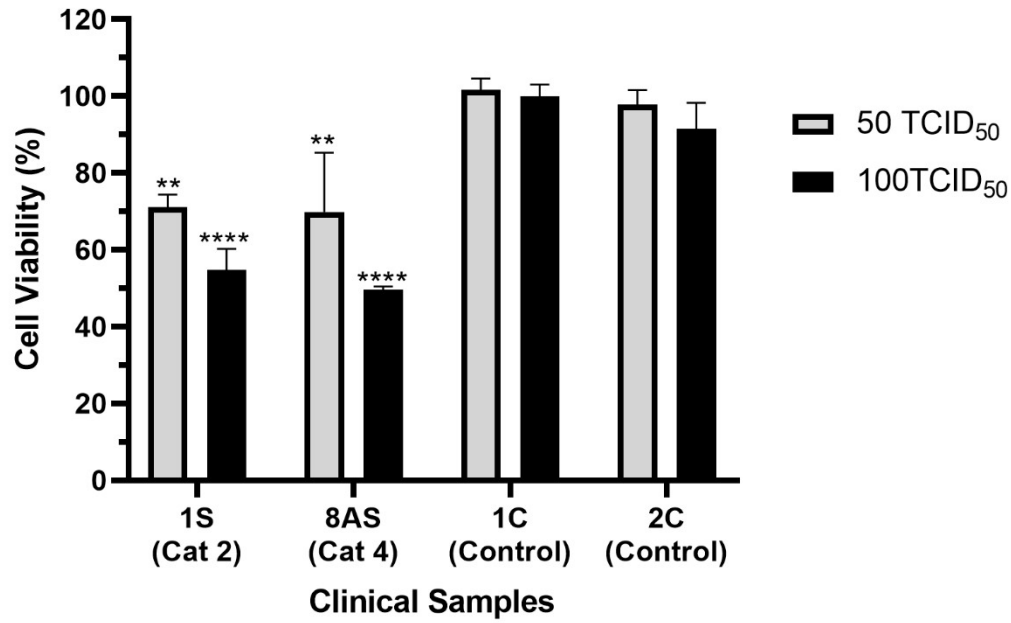

770

771 **Figure 5.**

772

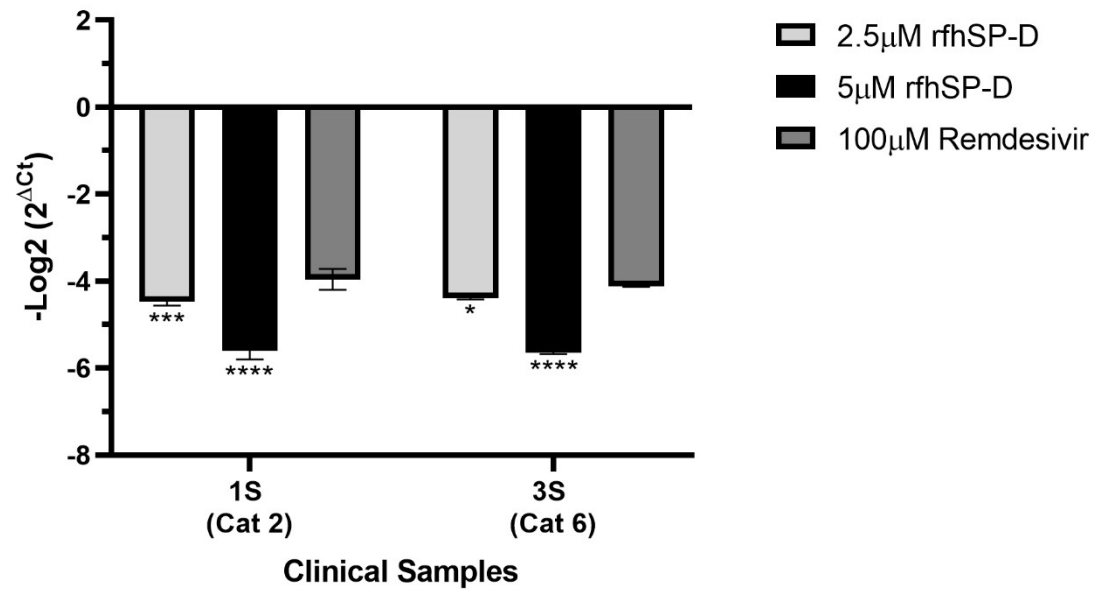

773

774 **Figure 6.**

775



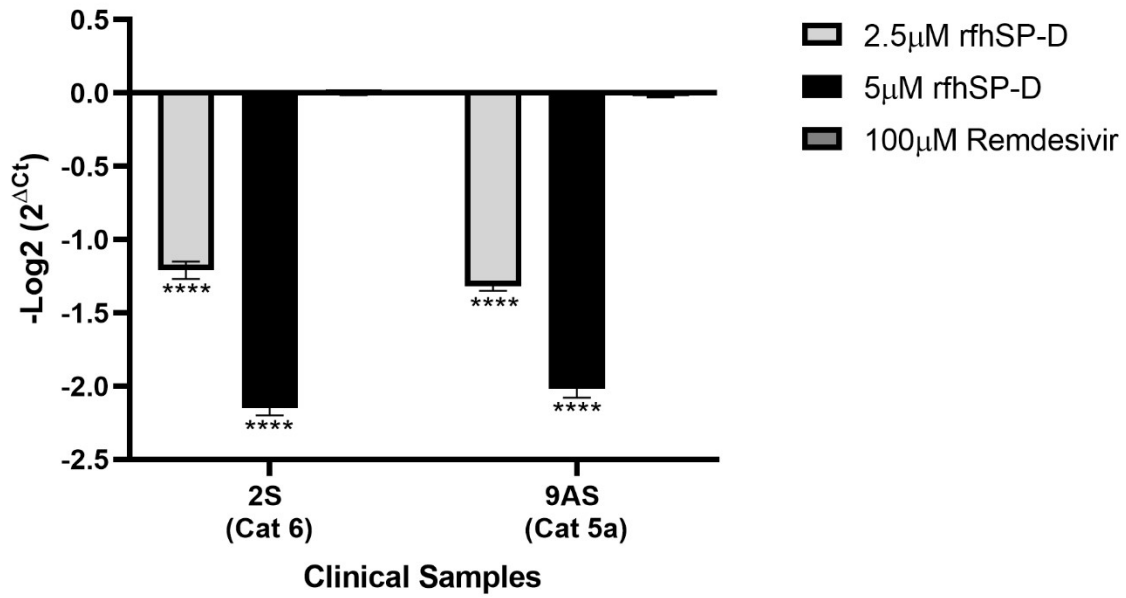

776

777 **Figure 7.**

778

779

780

781

782

783

784

785

786

787

788

789

790

791

792

793

794

795

796

797 **Supplementary Figures.**

798

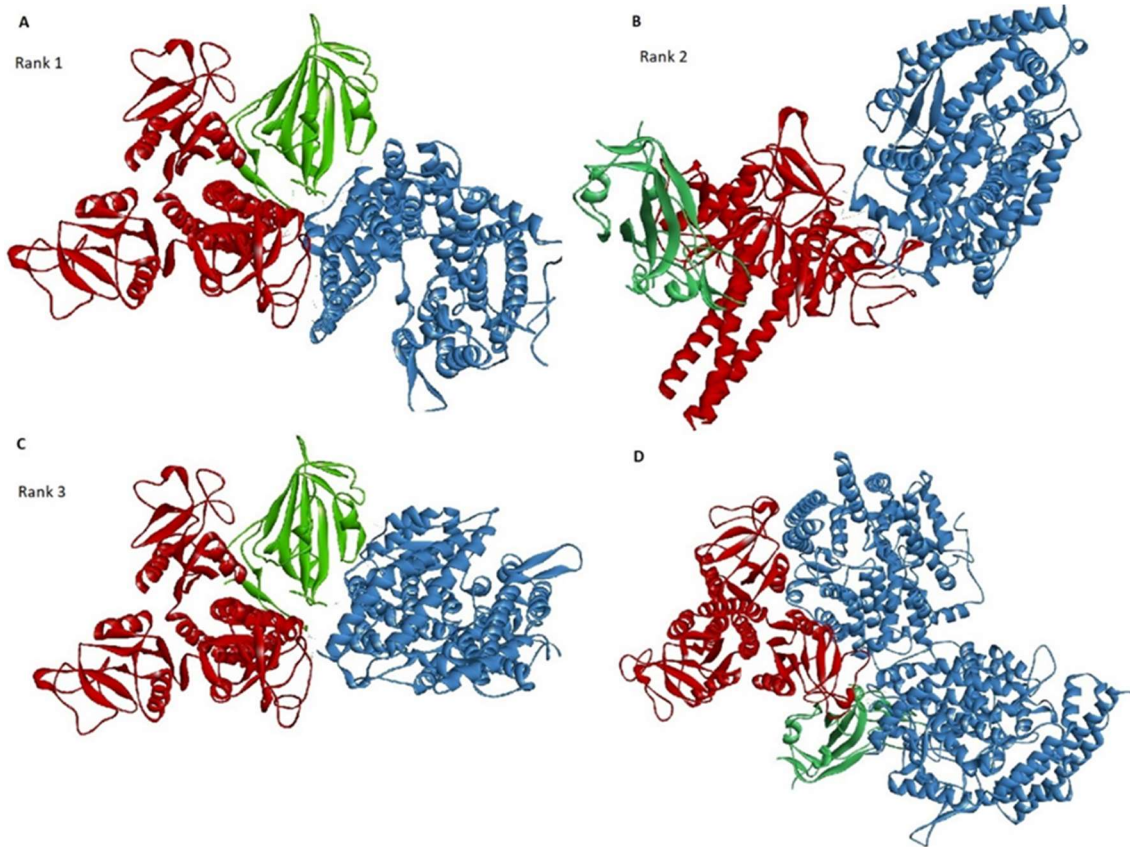

799

800 **Supplementary Figure S1: Docked poses of S protein (Green) and rfhSP-D (Red) complex**  
801 **with ACE2 (Blue) (A-C) and ACE2 and rfhSP-D complex with S protein (D).**

802

803

804

805

806

807

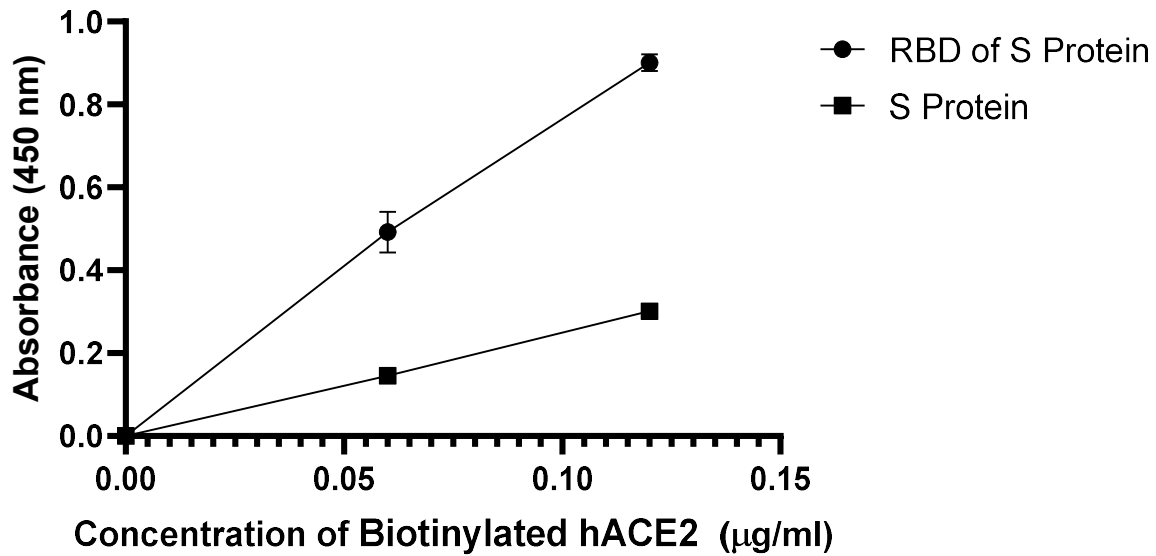

808

809 **Supplementary Figure S2: ELISA showing binding of Biotinylated human Angiotensin-**  
810 **converting enzyme 2 (hACE-2) to immobilised SARS-CoV-2 Spike protein (S protein)**  
811 **and the Ribosome Binding Domain (RBD) of the S protein in a linear range**

812 Microtiter wells were coated with 0.3 µg/ml of S protein, or 0.1 µg/ml of RBD of S protein.  
813 Decreasing concentration of hACE-2 (0.12, 0.06 and 0.00 µg/ml) were added to the wells. S  
814 protein or RBD: hACE-2 binding was detected with Streptavidin-HRP. Background was  
815 subtracted from all data points. The data were expressed as the mean of triplicates ± SD.

816

817

818

819

820

821

822

823

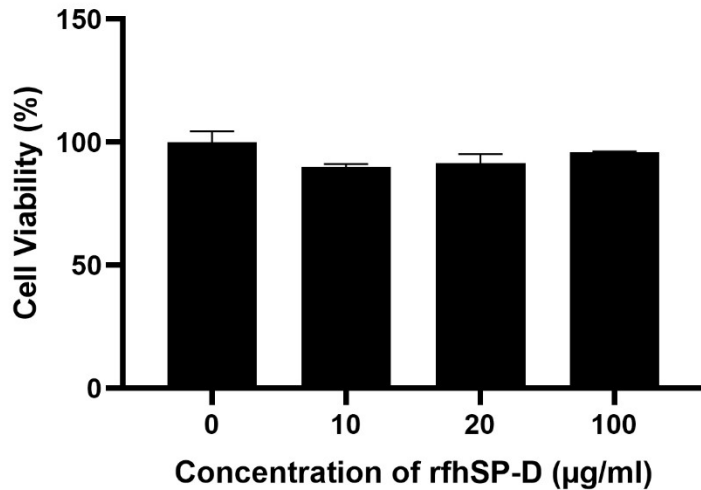

824

825 **Supplementary Figure S3: Vero cell viability assay via MTT following treatment with**  
826 **rfhSP-D**

827  $5 \times 10^4$  Vero cells/ well were seeded in complete MEM in 96-well culture plates and grown  
828 overnight at 37°C, 5% CO<sub>2</sub>. The cells were then treated with rfhSP-D (0, 10, 20, 100 µg/ml)  
829 for 24 h. 0.5 mg/ml MTT containing medium was added to the wells for 4h. The supernatants  
830 were removed, and cells were lysed using DMSO. Absorbance was measured at 590nm.  
831 Background was subtracted from all data points. The data obtained were normalised with 100%  
832 cell viability being defined as the mean of the absorbance recorded from the control sample (0  
833 µg/ml of rfhSP-D). The data were presented as the mean of the normalised triplicates ± SEM.  
834 Significance was determined using the two-way ANOVA test and no significant reduction in  
835 cell viability was observed.

836

837

838

839

840

841

842

843

844

845

846

847

848

849

850 **Supplementary Raw Data**

851 Table S1: Mean Ct values of SARS-CoV-2 RdRp gene for the replication assay

| Samples | 100 TCID <sub>50</sub> (MOI 0.01)                          |                                                             |                                                              |                                                               | Vero cells alone |
|---------|------------------------------------------------------------|-------------------------------------------------------------|--------------------------------------------------------------|---------------------------------------------------------------|------------------|
|         | Mean Ct value ± SD of samples treated with 0 µg/ml rfhSP-D | Mean Ct value ± SD of samples treated with 50 µg/ml rfhSP-D | Mean Ct value ± SD of samples treated with 100 µg/ml rfhSP-D | Mean Ct value ± SD of samples treated with Remdesivir (100µM) |                  |
| 1S      | 19.900 ± 0.327                                             | 23.900 ± 0.245                                              | 26.100 ± 0.327                                               | 24.800 ± 0.163                                                | Nd               |
| 2S      | 19.650 ± 0.531                                             | 23.833 ± 1.087                                              | 25.700 ± 0.163                                               | 25.000 ± 0.163                                                | Nd               |
| 3S      | 20.900 ± 0.163                                             | 22.400 ± 0.163                                              | 26.600 ± 0.327                                               | 25.900 ± 0.163                                                | Nd               |
| 4S      | 20.900 ± 0.163                                             | 21.800 ± 0.082                                              | 26.200 ± 0.082                                               | 26.250 ± 0.367                                                | Nd               |
| 5S      | 21.600 ± 0.082                                             | 24.350 ± 0.204                                              | 27.000 ± 0.163                                               | -                                                             | Nd               |
| 6S      | 19.700 ± 0.082                                             |                                                             | 26.150 ± 0.367                                               | -                                                             | Nd               |
| 7S      | 20.550 ± 0.204                                             |                                                             | 25.750 ± 0.122                                               | -                                                             | Nd               |
| 8AS     | 20.800 ± 0.163                                             |                                                             | 26.500 ± 0.245                                               | -                                                             | Nd               |
| 9AS     | 19.350 ± 0.122                                             |                                                             | 27.100 ± 0.163                                               | 25.700 ± 0.245                                                | Nd               |
| 10AS    | 20.600 ± 0.245                                             |                                                             | 27.150 ± 0.286                                               | 25.950 ± 0.531                                                | Nd               |
| 11AS    | 20.450 ± 0.204                                             |                                                             | 26.050 ± 0.122                                               |                                                               | Nd               |
| 12AS    | 20.500 ± 0.082                                             |                                                             | 27.150 ± 0.122                                               |                                                               | Nd               |
| 13AS    | 21.050 ± 0.122                                             |                                                             | 26.950 ± 0.204                                               |                                                               | Nd               |
| 14AS    | 19.500 ± 0.163                                             |                                                             | 26.200 ± 0.245                                               |                                                               | Nd               |
| 15AS    | 21.250 ± 0.204                                             |                                                             | 26.150 ± 0.367                                               |                                                               | Nd               |
| 1C      | Nd                                                         | Nd                                                          | Nd                                                           | Nd                                                            | Nd               |
| 2C      | Nd                                                         | Nd                                                          | Nd                                                           | Nd                                                            | Nd               |
| 3C      | Nd                                                         | Nd                                                          | Nd                                                           | Nd                                                            | Nd               |
| 4C      | Nd                                                         | Nd                                                          | Nd                                                           | Nd                                                            | Nd               |
| 5C      | Nd                                                         | Nd                                                          | Nd                                                           | Nd                                                            | Nd               |
| 6C      | Nd                                                         | Nd                                                          | Nd                                                           | Nd                                                            | Nd               |
| 7C      | Nd                                                         | Nd                                                          | Nd                                                           | Nd                                                            | Nd               |
| 8C      | Nd                                                         | Nd                                                          | Nd                                                           | Nd                                                            | Nd               |
| 9C      | Nd                                                         | Nd                                                          | Nd                                                           | Nd                                                            | Nd               |
| 10C     | Nd                                                         | Nd                                                          | Nd                                                           | Nd                                                            | Nd               |
| 11C     | Nd                                                         | Nd                                                          | Nd                                                           | Nd                                                            | Nd               |
| 12C     | Nd                                                         | Nd                                                          | Nd                                                           | Nd                                                            | Nd               |
| 13C     | Nd                                                         | Nd                                                          | Nd                                                           | Nd                                                            | Nd               |
| 14C     | Nd                                                         | Nd                                                          | Nd                                                           | Nd                                                            | Nd               |
| 15C     | Nd                                                         | Nd                                                          | Nd                                                           | Nd                                                            | Nd               |

\*Nd = Not Detected

852

853

854

855

856

857

858

859

860

861

862 Table S2: Mean Ct values of SARS-CoV-2 RdRp gene for the infection assay

| Sample      | 500 TCID <sub>50</sub> (MOI 0.05)                          |                                                             |                                                              |                                                               | Vero cells alone |
|-------------|------------------------------------------------------------|-------------------------------------------------------------|--------------------------------------------------------------|---------------------------------------------------------------|------------------|
|             | Mean Ct value ± SD of samples treated with 0 µg/ml rfhSP-D | Mean Ct value ± SD of samples treated with 50 µg/ml rfhSP-D | Mean Ct value ± SD of samples treated with 100 µg/ml rfhSP-D | Mean Ct value ± SD of samples treated with Remdesivir (100µM) |                  |
| <b>2S</b>   | 21.300 ± 0.245                                             | 22.500 ± 0.163                                              | 23.400 ± 0.082                                               | 21.500 ± 0.163                                                | Nd               |
| <b>3S</b>   | 21.300 ± 0.327                                             | 22.200 ± 0.082                                              | 23.750 ± 0.122                                               | 21.600 ± 0.327                                                | Nd               |
| <b>9AS</b>  | 21.900 ± 0.163                                             | 23.200 ± 0.163                                              | 23.900 ± 0.082                                               | 21.900 ± 0.163                                                | Nd               |
| <b>10AS</b> | 21.600 ± 0.163                                             | 22.800 ± 0.163                                              | 24.200 ± 0.163                                               | 22.200 ± 0.245                                                | Nd               |
| <b>11AS</b> | 21.100 ± 0.163                                             | 23.400 ± 0.245                                              | 24.500 ± 0.163                                               | 21.850 ± 0.122                                                | Nd               |
| <b>1C</b>   | Nd                                                         | Nd                                                          | Nd                                                           | Nd                                                            | Nd               |
| <b>2C</b>   | Nd                                                         | Nd                                                          | Nd                                                           | Nd                                                            | Nd               |
| <b>3C</b>   | Nd                                                         | Nd                                                          | Nd                                                           | Nd                                                            | Nd               |
| <b>4C</b>   | Nd                                                         | Nd                                                          | Nd                                                           | Nd                                                            | Nd               |

\*Nd = Not Detected

863
